# 1 Tract-specific statistics based on 2 diffusion-weighted probabilistic 3 tractography

4 **Andrew T. Reid<sup>1\*</sup>, Julia A. Camilleri<sup>2,3</sup>, Felix Hoffstaedter<sup>2,3</sup>, Simon B. Eickhoff<sup>2,3</sup>**

\*Corresponding author:

[andrew.reid@nottingham.ac.uk](mailto:andrew.reid@nottingham.ac.uk)

5 <sup>1</sup>School of Psychology, University of Nottingham, UK; <sup>2</sup>Institute for Neuroscience and Medicine  
6 (INM-7), Jülich Research Center, Jülich, Germany; <sup>3</sup>Institute of Systems Neuroscience, Medical  
7 Faculty, Heinrich Heine University, Düsseldorf, Germany

---

9 **Abstract** Diffusion-weighted neuroimaging approaches provide rich evidence with which to estimate the  
10 structural integrity of white matter in vivo. Tract-based spatial statistics (TBSS), for instance, allows us to  
11 assess the spatial distribution of statistical tests performed on diffusion properties such as fractional  
12 anisotropy, which are proposed to reflect the integrity of white matter tracts. However, such methods do  
13 not provide a direct assessment of white matter integrity for connections between two specific regions of  
14 the brain. Here, we present a novel method for deriving tract-specific diffusion statistics, based upon  
15 arbitrarily-defined regions of interest. Our approach makes use of an empirically-derived population  
16 distribution based on probabilistic tractography, using the Nathan Kline Institute (NKI) Enhanced  
17 Rockland sample. We use a heuristic method to determine the most likely geometry of a path between  
18 two regions, if one exists, and express this as a spatial distribution. We then estimate the average  
19 orientation of streamlines traversing this path, at discrete distances along its trajectory, and compute the  
20 fraction of diffusion directed along this orientation for each participant. This allows us to obtain  
21 participant-wise metrics along the specific tract (tract-specific anisotropy; TSA), which can then be used  
22 to perform statistical analysis on any comparable population. Based on this method, we report both  
23 negative and positive associations between age and TSA for two networks derived from published  
24 meta-analytic studies (the “default mode” and “what-where” networks), along with more moderate sex  
25 differences and age-by-sex interactions in both networks.

---

## 27 Introduction

28 Diffusion-weighted imaging (DWI) is a promising non-invasive in vivo technique for evaluating the integrity  
29 of myelinated axonal projections in the brain. DWI is based on the attenuation of the T2-weighted MRI  
30 signal in the presence of a field gradient, which indicates the degree to which diffusion is unrestricted in  
31 brain tissue in the direction of that gradient. Methods that reconstruct DWI maps across multiple gradient  
32 orientations can be used to model the diffusion of water molecules in discrete compartments (or voxels)  
33 of brain tissue, and the **anisotropy** of this diffusion can be used to estimate the orientation(s) along which  
34 diffusion is biased in that voxel. Because myelin is highly lipid-based, and forms a strong hydrophobic  
35 barrier, the degree of directed anisotropy in a white matter voxel is presumed to indicate the degree to  
36 which it is comprised of coherently oriented myelinated axons (*Assaf and Pasternak, 2007*). Moreover,  
37 variance in this anisotropy can be used to estimate the relative integrity of myelinated fibres that run  
38 through a voxel – with the assumption being that decreased anisotropy indicates a decrease in myelination  
39 or myelinated axons.

40 The simplest model of diffusion used for DWI analysis is the **diffusion tensor**, which assumes a Gaus-  
41 sian distribution with one principal and two secondary axes, corresponding to the first three eigenvectors  
42 of observed diffusion across gradient orientations (*Basser and Jones, 2002; Chung et al., 2010*). From this  
43 model, we can obtain a summary measure of anisotropy (fractional anisotropy; FA), based on the relative  
44 magnitudes of the eigenvalues associated with each axis of the tensor. FA ranges from 0 to 1, where 0  
45 indicates perfect isotropy (as would be expected of a uniform substance such as water or cerebrospinal  
46 fluid), and 1 indicates diffusion exclusively in the principal direction. The diffusion tensor can also be used  
47 to perform **deterministic tractography**, in which streamlines are generated by starting at a pre-specified  
48 set of “seed” voxels, and propagated through a series of neighbouring voxels by reorienting at each ac-  
49 cording to its principal orientation of diffusion. Tractography can also be set in a probabilistic framework,  
50 by generating many streamlines and sampling at each voxel from a posterior probability distribution of  
51 orientations based on the tensor model (*Behrens et al., 2003*).

52 While the basic diffusion tensor is an adequate model for voxels through which fibres are essentially  
53 oriented in a single direction (e.g., fibres traversing the corpus callosum), it fails to model more complex  
54 situations, such as the case where two or more fibres are crossing, diverging, or converging. This presents a  
55 strong bias in favour of finding certain pathways over others. One way of addressing this issue is to explicitly  
56 model multiple fibre directions, for example by using Bayesian model estimation to determine whether  
57 multiple fibre orientations are present, and if so how strongly they contribute to the observed diffusion  
58 signal (*Behrens et al., 2007*). Such an approach greatly improves the ability of probabilistic tractography to  
59 discover tracts which traverse areas of uncertainty. As an example from Behrens et al. (2007): while seeding  
60 in the internal capsule led only to a prominent primary motor projection in the single-fibre approach,  
61 numerous other cortical targets were reached when crossing fibres were explicitly modelled.

62 It is often desirable to relate voxel-wise DWI-based metrics such as FA to other phenotypical obser-  
63 vations, such as behavioural or cognitive measures, or clinical status. Voxel-wise analyses can be highly  
64 confounded by the individual geometry of white matter tracts, and one way to address this issue is tract-  
65 based spatial statistics (TBSS), in which FA measures are projected onto a population-based FA “skeleton”  
66 with a high probability of being white matter in all participants (*Smith et al., 2006, 2007*). The presence of  
67 crossing fibres, however, also has implications for the interpretation of FA (*Jbabdi et al., 2010*). As an exam-  
68 ple, for two identical fibres oriented along the anteroposterior (AP) axis, FA would be inversely proportional  
69 to the number of fibres crossing each along the (perpendicular) mediolateral (ML) axis. Interpreting FA in  
70 terms of the underlying microstructure of white matter in a voxel is thus inherently ambiguous. This ambi-  
71 guity can be improved if crossing fibres are explicitly modelled, for example using the Bayesian approach  
72 described above. Such a crossing fibre model has been proposed as an extension to the TBSS approach  
73 (*Jbabdi et al., 2010*).

74 Although TBSS provides a means of assessing the spatial distribution of statistical effects on white mat-  
75 ter integrity, it is often difficult to apply this distribution to specific connectivity in the brain. Suppose, for  
76 instance, that we are interested in whether the white matter comprising the physical connection between  
77 brain regions  $R_a$  and  $R_b$  is altered in condition  $C$ . Using TBSS, we observe that the  $C+$  group has decreased  
78 FA in an area of white matter that *could* be intermediary to  $R_a$  and  $R_b$ . However, as most major white mat-  
79 ter tracts host a mixture of numerous projection, association, and commissural fibres, we can only really  
80 speculate about the possibility of a compromised  $R_a R_b$  tract. To improve interpretability, we require an  
81 explicit approximation of the geometry of tract  $R_a R_b$ , and an estimate of the diffusion specifically oriented  
82 along this tract.

83 In this study, we introduce a novel methodology to address both of these issues. We first perform prob-  
84 abilistic tractography on a representative sample of participants (N=130, aged 18-80), using high angular  
85 resolution DWI data from the Nathan Klein Institute Enhanced Rockland sample (*Nooner et al., 2012*), and  
86 two sets of regions-of-interest (ROIs) obtained from published meta-analytic neuroimaging studies. For  
87 each pair of ROIs  $R_a$  and  $R_b$ , we then compute the probability of a tract passing through a given voxel, and  
88 use a heuristic approach to determine whether a tract likely exists between  $R_a$  and  $R_b$ , and what its most  
89 probable trajectory is. Finally, we use an approach similar to Behrens et al. (2007) to determine for each  
90 participant, and each voxel, the degree of diffusion in the direction of the tract at that voxel. This yields

## Probabilistic Tractography

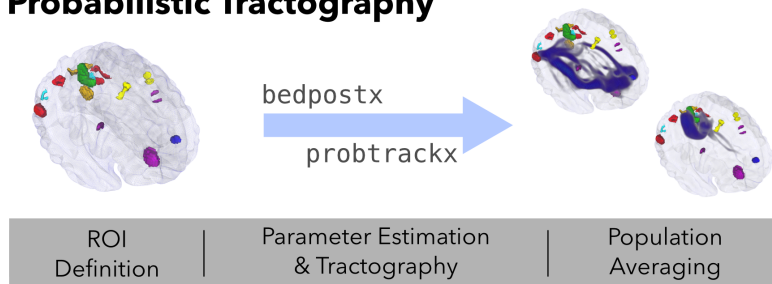

## Tract Trajectory Estimation

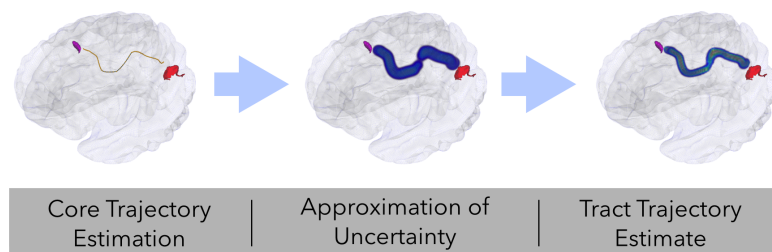

## Tract-Specific Anisotropy

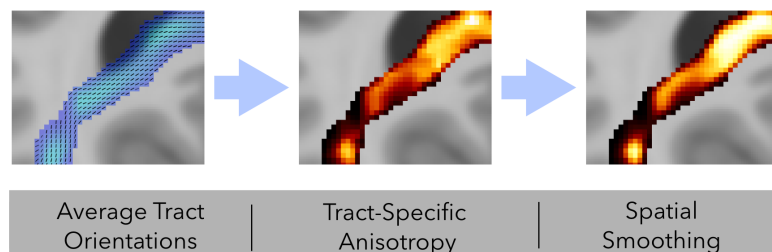

**Figure 1.** Schematic of the procedure followed in this study. *Probabilistic tractography*: ROIs were obtained from previous meta-analytic studies and used as seed/target regions for diffusion tensor modelling with `bedpostx` and probabilistic tract tracing performed with `probtrackx`, across all participants. The resulting probability distributions were averaged across directions for each ROI pair ( $\mathbf{P}_{ab}$ ). *Tract trajectory estimation*: For each ROI pair, a “core” trajectory was estimated from these bidirectional averages, and represented as a 3-dimensional polyline. An uncertainty field ( $\Phi_{ab}$ ) was then generated from this polyline using an anisotropic Gaussian kernel. Finally, a “core” tract estimate ( $\mathbf{P}_{ab-tract}$ ) was generated as the element-wise product of  $\mathbf{P}_{ab}$  and  $\Phi_{ab}$ . *Tract-specific anisotropy*: Average tract orientations were computed for each voxel in a given tract, and these orientations were then regressed against the diffusion evidence for each individual participant. This produced a tract-specific anisotropy (TSA) distribution for each participant, that can be regressed against variables of interest.

a tract-specific anisotropy (TSA) metric that can be regressed against variables of interest. Here, we report the tract-wise and 3D distributions of TSA regressed against age, sex, and their interaction.

## Results

### Tract determination

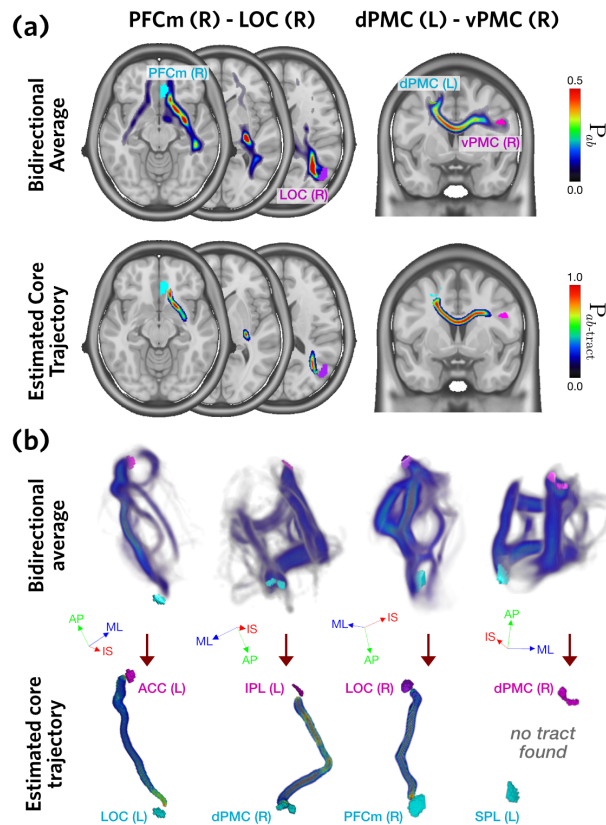

**Figure 2.** (a) Core tract trajectory estimation steps, shown for two exemplar tracts. The top row shows the streamline probability determined across all participants, averaged in both directions,  $P_{ab}$ . The bottom row shows the estimated core trajectory for each ROI pair,  $P_{ab-tract}$ . (b) Three-dimensional distributions of  $P_{ab}$  (top) and  $P_{ab-tract}$  (bottom), for four exemplar tracts. Axis labels: ML, medial-lateral; AP, anterior-posterior; IS, inferior-superior.

dPMC(R). For the vast majority of tracts, this method was able to isolate a single, core trajectory from a variety of alternatives.

For the DMN, 33 of 36 ROI pairs (92%) produced core tract estimates (Figure 3). Two of the failed tracts involved the left PFCm, with the more posterior LOC(R) and PCm(L) regions. Tracts connecting PCm and PCG to PFC and ACC traversed the more superior cingulum bundle, while those connecting LOC to PFC and ACC traversed the more inferior fronto-occipital fasciculus. Contralateral DMN connections traversed the splenium of the corpus callosum (CC; Figure 3d) for posterior ROIs, and the genu of the CC for anterior ROIs and anteriorly projecting LOC connections.

For the WWN, 43 of 45 tracts were estimated (96%), with only 2 tracts failing because no core tract could

We used a heuristic approach (see Figure 1) to determine the most probable trajectory of a white matter projection between two regions of interest (ROIs). For a given pair of ROIs  $R_a$  and  $R_b$ , we performed probabilistic tractography twice, seeding in one of these regions and terminating in the other. The resulting directed probability distributions were averaged to obtain a bidirectional probability average, which was then thresholded in order to identify a set of contiguous voxels connecting the two regions. If this step did not result in such a pathway, a connection between  $R_a$  and  $R_b$  was rejected; otherwise, we identified the “core” of the pathway and used this to obtain a final bidirectional tract trajectory estimate. Tract determination was carried out on two sets of ROIs, derived from previously published meta-analytic studies: the default mode network (DMN), and the what-where network (WWN).

Figure 2a illustrates the tract trajectory estimation process for example tracts PFCm(R) - LOC(R) and dPMC(L)-vPMC(R). The horizontal and coronal slice renderings show the initial minimal bidirectional averages (top row) and final tract trajectory estimates (bottom row). Figure 2b shows three-dimensional renderings of these steps, including the failure to estimate a core trajectory for SPL(L)-

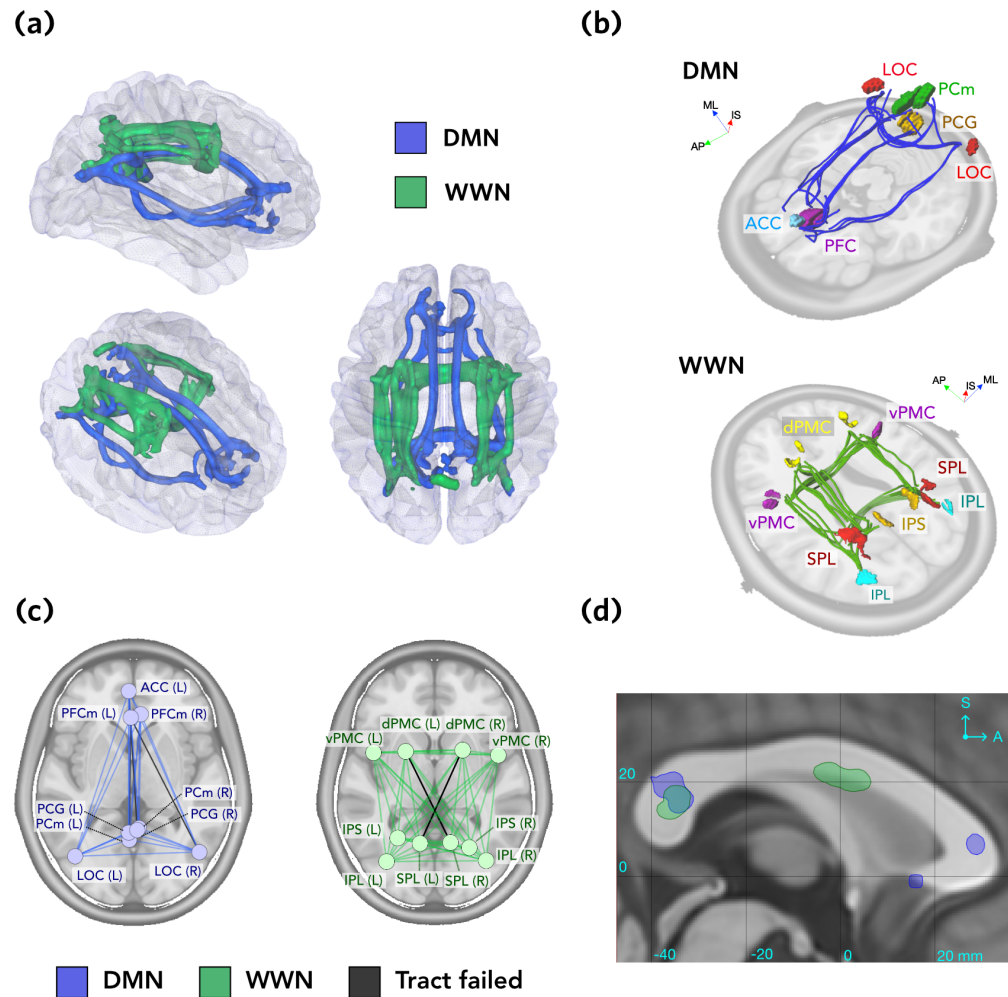

**Figure 3.** Tract determination. **(a)** All accepted tracts shown for the DMN (blue) and WWN (green) networks, rendered as isosurfaces thresholded at 0.5 (top, right, and oblique perspectives). **(b)** Core polylines representing the trajectories of accepted tracts in the DMN (top) and WWN (bottom) networks. Images are rendered with oblique perspectives next to planar sections of the ICBM non-linear T1 template image, for reference. See Materials and Methods for names of the ROIs. **(c)** Graph representations of the DMN (blue) and WWN (green) networks, with failed edges shown in grey. Graph vertices represent the center points of each ROI, projected onto the transverse plane. **(d)** Sagittal section at midline, showing where contralateral tracts (thresholded at 0.5) for each network traverse the corpus callosum. Coordinates are ICBM152. Axis labels: ML, medial-lateral; AP, anterior-posterior; IS, inferior-superior.

140 be identified (**Figure 3**). The failed tracts were the two contralateral connections between SPL and dPMC  
141 (Figure 3c). Successfully estimated tracts consisted of anteroposterior projections traversing the superior  
142 longitudinal fasciculus, and contralateral connections traversing the splenium of the CC and the inferior  
143 part of the body of the CC (Figure 3d).

### 144 **Tract-specific anisotropy**

145 Given a tract trajectory estimate, as described above, we next wanted to determine how strongly diffusion  
146 profiles of individual participants were oriented along that tract. For a given voxel, we determined the  
147 average streamline orientation derived from the previous probabilistic tractography step, and then com-  
148 puted, for each participant, a “tract-specific anisotropy” (TSA) estimate, indicating the degree to which this  
149 average orientation loaded onto the DWI intensities along each gradient direction (TSA values are the  $\beta$   
150 parameters estimated from **Equation 3**).

151 Kernel density estimates for TSA, for both networks, are shown in **Figure 4a**. These show the distribution  
152 of scores for tracts thresholded at  $\mathbf{P}_{ab-tract} > 0.5$ . While most distributions were roughly Gaussian, with a  
153 heavy positive tail, this varied across tracts in terms of both kurtosis and skewness, and some shorter  
154 tracts (e.g., PCG(L)-PCm(R)) had very little variance. For a number of tracts (e.g., SPL(R)-IPS(L)), a bimodal  
155 distribution was evident. The overall distribution for each network is shown in the insets; WWN showed a  
156 broader, flattened distribution relative to DMN.

157 **Figure 4b** shows the two-dimensional spatial distributions of TSA scores for two exemplar participants,  
158 along with the average TSA across all 130 participants. These distributions demonstrate variability be-  
159 tween participants, but in general the highest TSA scores were observed in the center of estimated tract  
160 trajectories - reflecting the strongest loading of diffusion profiles - which tapered off towards the edges.

### 161 **Tract-specific Age and Sex effects**

162 Having obtained TSA scores for each individual participant, we were next interested in whether these  
163 scores were associated with age, sex, and their interaction. We performed voxel-wise regressions of the  
164 form  $TSA = \beta_0 + \beta_1 \cdot Age + \beta_2 \cdot Sex + \beta_3 \cdot Age \times Sex + \epsilon$ . T-statistics for each coefficient were obtained, and  
165 summarised at each distance along the tract. For each tract, we then used one-dimensional random field  
166 theory to identify significant clusters of t-statistics ( $p < 0.05$ ). To control for family-wise error, we limited the  
167 false discovery rate (FDR) over all tracts to 0.05.

168 For the DMN, there were significant associations of TSA with age and sex, as well as the interaction  
169 between these two factors (**Figure 5**, top row). Age effects were fairly diffuse. Negative effects of age were  
170 found in 15/32 (47%) of DMN tracts, including ipsi- and contralateral connections between PFC and LOC  
171 (traversing the fronto-occipital fasciculus), and PCm(L)-PFCm(R). Modest positive effects of age were also  
172 found for 4/32 (12%) of tracts. These were smaller, and comprised exclusively of ipsilateral tracts (three  
173 left and one right). Both positive (female > male) and negative sex differences were also found. **Figure 6**  
174 shows scatter and violin plots for selected tracts. Notably, tract PCm(L)-PCG(L) showed effects for age, sex,  
175 and their interaction; and tract ACC(L)-LOC(L) and PFCm(R)-LOC(R) showed both positive and negative age  
176 effects.

177 The WWN also showed significant associations for age, sex, and their interaction (**Figure 5**, bottom  
178 row). Surprisingly, there were strong positive and negative age effects for this network, with 16/32 (50%)  
179 having showing negative effects and 14/32 tracts (44%) showing positive effects. Compared to DMN,  
180 the age effects for WWN were more focal. Negative age effects were found proximal to dPMC(L), and in  
181 colossal fibres traversing the body of the corpus callosum (see **Figure 3d**), involving contralateral tracts  
182 between dPMC and vPMC. There were also negative associations found in contralateral tracts between IPS,  
183 dPMC, and vPMC. The largest positive age effects occurred along anteroposterior-oriented tracts in the  
184 longitudinal fasciculus, particularly those involving left and right dPMC. All sex differences were negative  
185 (male > female) for this network, on were found on contralateral tracts. **Figure 6** shows scatter and violin  
186 plots for selected tracts. Notably, the homotopic dPMC(L)-dPMC(R) tract showed both a sex difference and  
187 an Age×Sex interaction.

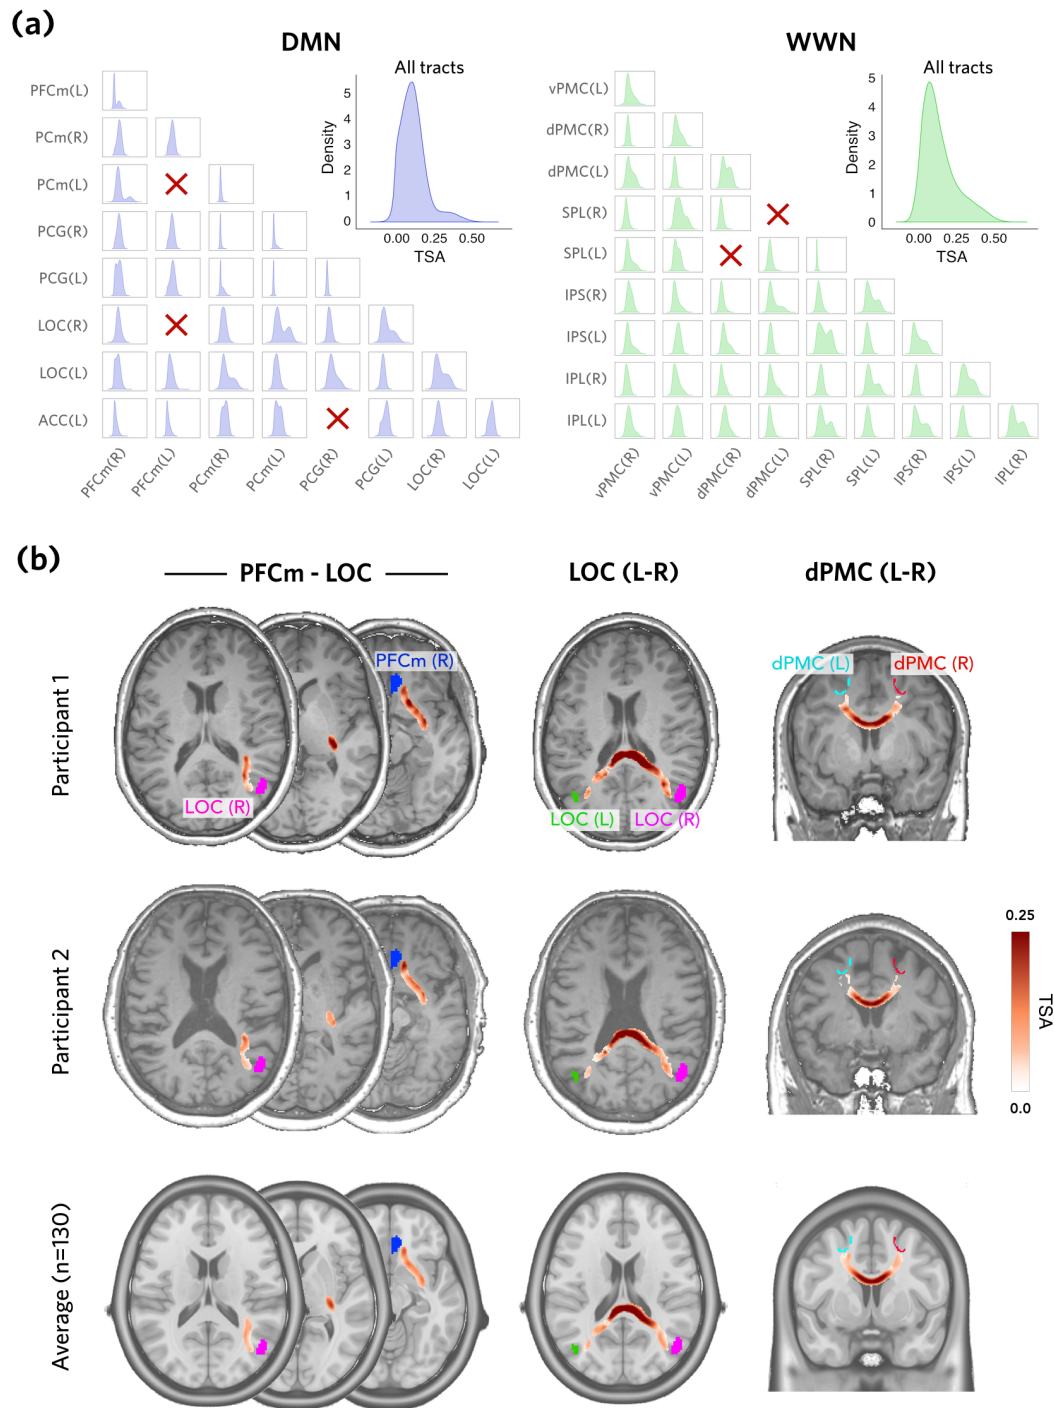

**Figure 4.** Tract-specific anisotropy (TSA). **(a)** Distributions of TSA across voxels and participants, for each estimated tract (ROI pair), shown as kernel density estimates for DMN (blue) and WWN (green). Insets show the distribution of TSA values over all tracts; x-axis scales are the same for all plots. Red crosses indicate that no tract was generated. **(b)** Spatial distributions of TSA values for two exemplar participants and averaged over all participants, and three exemplar tracts, shown in horizontal and coronal section. Anatomical images are the ICBM152 nonlinear template.

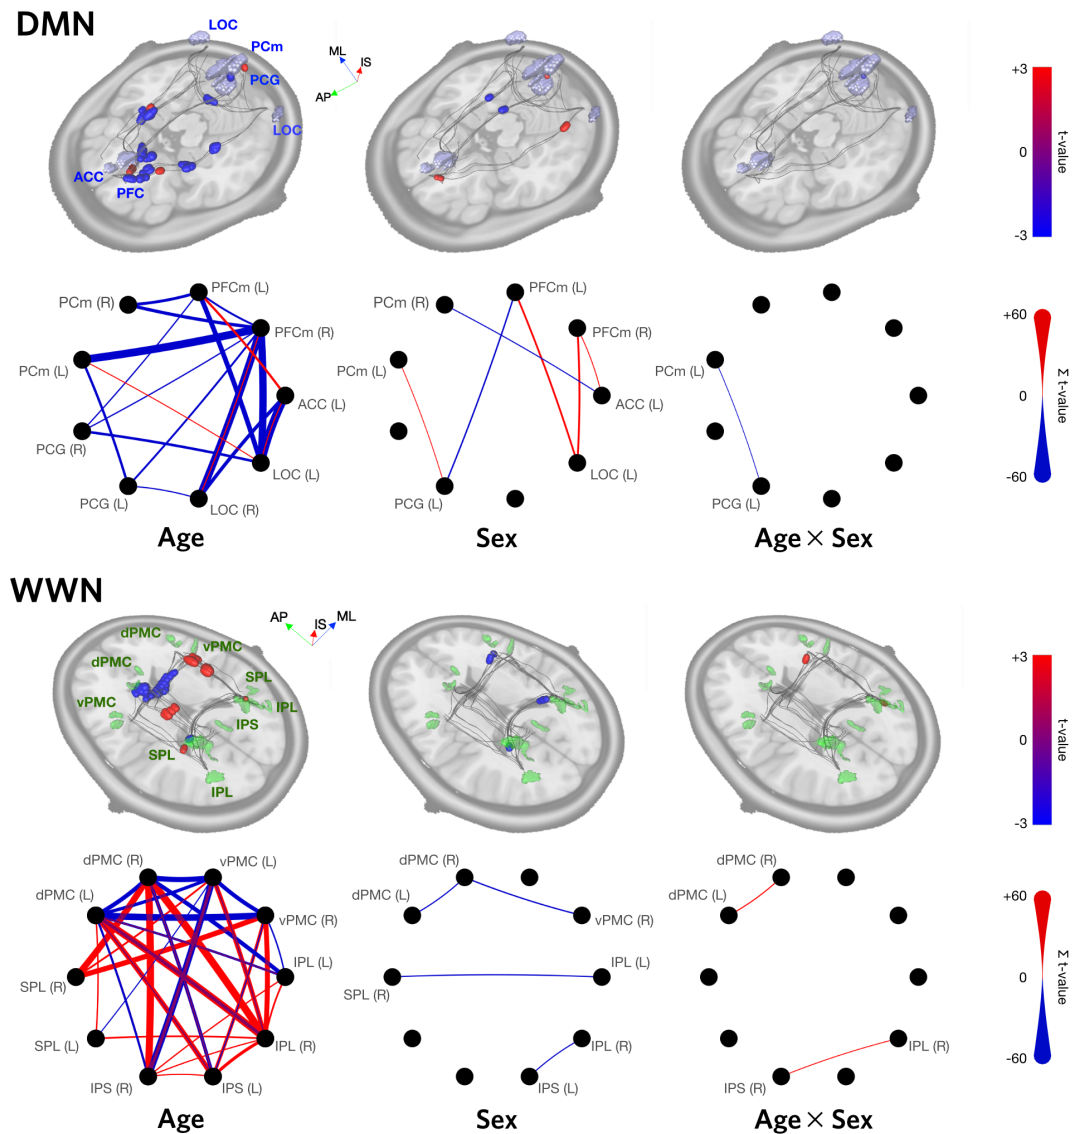

**Figure 5.** Regression results for both networks, for linear models of the form  $TSA = Age + Sex + Age \times Sex + e$ . 3D renderings show the maximal t-values (thresholded using cluster-wise inference, with  $FDR < 0.05$ ) at each distance along the core trajectories of each tract in the network. Circular graph representations show the sum of significant positive (red) and negative (blue) t-values for each tract. The thickness of an edge is proportional to its sum, and the absence of an edge indicates that no significant clusters were found for that tract. Axis labels: ML, medial-lateral; AP, anterior-posterior; IS, inferior-superior

**Figure 5–Figure supplement 1.** GLM t-value distance traces for all ROI pairs in the DMN.

**Figure 5–Figure supplement 2.** GLM t-value distance traces for all ROI pairs in the WWN.



188 Scatter and violin plots for all significant effects, and line plots and tables showing raw and cluster-  
189 thresholded t-values for all tracts, are provided in Supplementary Material.

## 190 Discussion

### 191 Estimation of core tract trajectories

192 In this study we introduce a novel method for obtaining tract-specific spatial estimates of the “core” trajec-  
193 tories of projections between two arbitrarily defined ROIs, on the basis of probabilistic DWI tractography  
194 performed across a representative cohort of healthy individuals. This approach yielded plausible trajectory  
195 estimates for 33 of 36 ROI pairs (92%) in the DMN network, and 43 of 45 ROI pairs (96%) in the WWN network.  
196 In order to achieve sufficient coverage of the space of possible trajectories, we derived our probability es-  
197 timates from a large number of streamlines (50,000 × ROI) over 130 participants. Our results demonstrate  
198 the feasibility of using DWI-based probabilistic tractography for delineating individual tracts between ar-  
199 bitrary pairs of distal brain regions, as well as obtaining participant- and tract-specific anisotropy values  
200 from these tracts.

201 ROI pairs failed to generate tract trajectory estimates when the thresholding applied to the bidirectional  
202 population average distribution broke the contiguous path between them. Notably, this is not evidence  
203 that the tract does not exist, but rather that there is ambiguity about the location of its trajectory, based on  
204 the diffusion evidence. It is important to note that the threshold applied here was determined somewhat  
205 arbitrarily, i.e., by observing what value reduced the number of alternative pathways to a single, core one.  
206 In cases where this failed, there were typically two or more alternatives that could not be disambiguated  
207 (see **Figure 2b** for an illustration of failed tract SPL(L)-dPMC(R)). Further investigation into these ROI pairs,  
208 e.g., by comparing them to known connectivity evidence from tract tracing studies (in non-human primates)  
209 or different modalities (in humans), may be useful for determining whether a tract indeed exists between  
210 them.

211 Previous studies have also evaluated white matter tract geometry using DWI. In a now-classic study,  
212 **Catani et al. (2002)** used deterministic tractography to identify and “dissect” individual tracts based on  
213 seed ROIs. This was extended by **Jones et al. (2005)** in order to map diffusion metrics onto the trajectories  
214 of specific tracts. More recently, **Colby et al. (2012)** used B-spline resampling to map FA to specific tracts in  
215 individual participants, allowing effects to be mapped to points along its trajectory. The present approach  
216 extends the work of these previous studies, in that it facilitates the investigation of white matter pathways  
217 connecting specific ROI pairs, rather than coarse-scale fasciculi, in terms of tract geometry and anisotropy  
218 estimation. Another important advantage is its use of a probabilistic tractography framework to describe  
219 the “core” trajectories of specific tracts across a population of interest.

### 220 Tract-specific anisotropy

221 It is common to use streamline counts from probabilistic tractography as an estimate of connection  
222 strength between two ROIs (e.g., **Daianu et al., 2013; Lohse et al., 2014; Reid et al., 2016b**). This approach,  
223 however, suffers from a number of seemingly intractable biases, including: the nature of the diffusion pro-  
224 file through which a given tract traverses (anisotropy bias); the length of the tract (distance bias); and the  
225 position of seed and target ROIs relative to gyri or sulci (**Reveley et al., 2015; Reid, 2016**). It is thus uncertain  
226 how to interpret a relative streamline count, or change in this quantity in association with some covariate  
227 of interest, with respect to biophysical properties such as white matter integrity or connectivity strength.  
228 The present approach is arguably less susceptible to these biases, because it only models the geometry  
229 of streamlines that *do* connect two ROIs. However, future research efforts should be directed at validating  
230 (1) the interpretability of TSA with respect to axonal white matter integrity, and (2) the spatial specificity  
231 of trajectory estimates. This could be done, for example, through the use of phantoms (**Zhu et al., 2011;**  
232 **Caspers and Axer, 2017**) or histological approaches (**Mollink et al., 2017; Schaeffer et al., 2018**).

233 The present method might be considered an extension of the well-known TBSS approach (**Smith et al.,**  
234 **2007**), in which statistics are projected onto a pre-established population-based white matter “skeleton”,

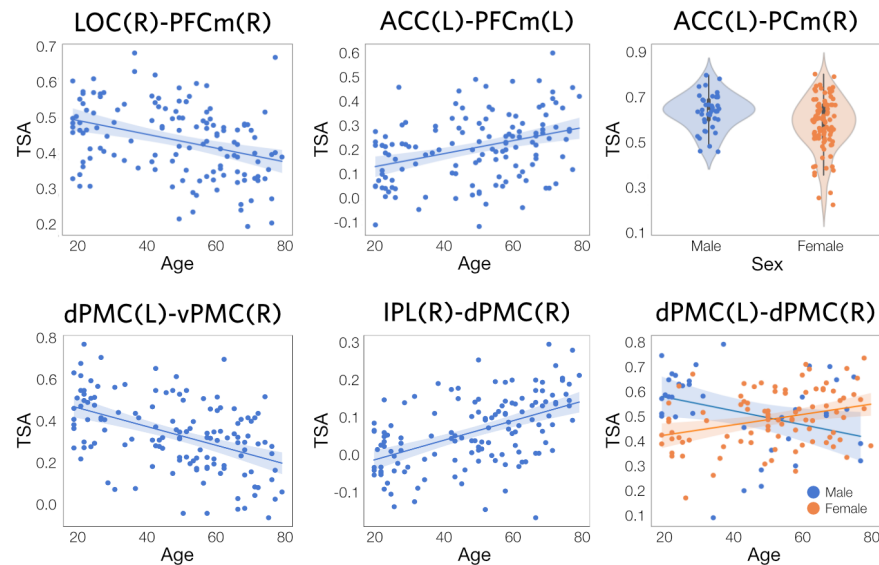

**Figure 6.** Plots of selected TSA regression results. *Top row:* DMN tracts with (from left to right) negative and positive age effects, and a sex difference (male > female). *Bottom row:* WWN tracts with negative and positive age effects, and an Age×Sex interaction. Data points are the mean TSA values within significant clusters (as shown in **Figure 5**). Shaded areas on scatterplots represent 95% confidence intervals.

**Figure 6–Figure supplement 1.** Scatter and violin plots for all significant effects in the DMN.

**Figure 6–Figure supplement 2.** Scatter and violin plots for all significant effects in the WWN (Part A).

**Figure 6–Figure supplement 3.** Scatter plots for all significant effects in the WWN (Part B).

235 which serves a similar function to population-based anatomical grey matter templates, such as the linear  
 236 and nonlinear ICBM-152 templates (Fonov et al., 2009; Mazziotta et al., 1995). There are two major  
 237 advantages of the present method over TBSS: (1) it allows a population-based tract estimate to be derived  
 238 specifically for the white matter tract connecting any two arbitrarily-defined ROIs, if that tract is likely to  
 239 exist; and (2) it allows participant- and tract-specific anisotropy to be estimated, based on the orientation  
 240 of streamlines defining that tract in each voxel along its trajectory. Conversely, one major limitation with  
 241 the TSA approach is that it is substantially more computationally intensive, and scales quadratically with  
 242 the number of ROIs in a network of interest.

### 243 Age and sex are associated with tract-specific anisotropy

244 Positive and negative age/TSA associations were found for both networks. There is an abundance of evi-  
 245 dence for age-related decreases in DMN connectivity, including a decrease in fMRI-based resting-state  
 246 functional covariance (Hafkemeijer et al., 2012; Marstaller et al., 2015; Sambataro et al., 2010), and age-  
 247 related decreases in FA in white matter tracts proximal to DMN regions (Marstaller et al., 2015). Marstaller  
 248 and colleagues found a reduction in the extent to which posterior cingulate and precuneus activity covar-  
 249 ied with wider brain networks, along with reduced FA in numerous tracts, including the fronto-occipital  
 250 fasciculus, where the current negative age association is most prominent. Sambataro et al. reported de-  
 251 creased covariance between PCC and PFC, which predicted working memory performance. Decreases in  
 252 DMN functional covariance also appear to be accelerated in Alzheimer’s disease (Jones et al., 2011; also  
 253 reviewed in Reid and Evans, 2013).

254 For the WWN, age-related decreases in TSA occurred mainly in the body, but not the splenium, of the  
 255 corpus callosum. This pattern is in agreement with several DWI-based studies of age-related connectivity  
 256 changes. Burzynska et al. (2010) used TBSS to show an age-related reduction in FA (and increase in radial  
 257 and mean diffusivity) in the genu and body of the corpus callosum, but not the splenium. Using a DTI

258 approach, **Bennett and Madden (2014)** found decreased FA in older versus younger participants for both  
259 the genu and splenium, but with a more pronounced effect in the former. The same authors report an  
260 anterior-to-posterior gradient in age-related FA changes, with these being more pronounced in frontal  
261 white matter, consistent with the pattern found in the current study (**Bennett et al., 2009**).

262 Positive age associations were a more surprising finding, as numerous articles report negative age/FA  
263 associations (e.g., **Kodiweera et al., 2016**) and postmortem evidence of white matter loss and decrease in  
264 the proportion of small myelinated fibres with age (**Tang et al., 1997; Aboitiz et al., 1997**). Both positive and  
265 negative age/FA associations have been reported in at least one previous brain-wide TBSS study (**Kochunov  
266 et al., 2007**), however. For DMN in particular, we found that most positive associations occurred in regions  
267 proximal to ROIs, where the potential confound of crossing fibres is likely more pronounced (**Jeurissen  
268 et al., 2012**). The positive relationships in the WWN were especially prominent, and suggest a (paradoxical)  
269 increase in white matter integrity in these tracts. The majority of positive relationships in WWN were found  
270 in the middle of the superior longitudinal fasciculus (SLF). One TBSS study focusing on the SLF in a healthy  
271 cohort found no effect of age on FA (**Madhavan et al., 2014**), while another whole-brain study found SLF  
272 among tracts with negative age effects (**Marstaller et al., 2015**). Increased FA in Alzheimer's disease patients  
273 has also been reported in SLF (**Douaud et al., 2011**). The authors of this study suggest that a relative sparing  
274 of crossing motor fibres may account for this effect, but this is consistent with our observed increase in TSA;  
275 on the contrary, our findings might be explained by a relative *decrease* in WM integrity in these crossing  
276 fibres.

277 It is possible that the increased specificity of the current approach permits a more fine-grained spatial  
278 and angular dissection of effects than does TBSS with FA, which uses a more coarse-grain white matter  
279 skeleton, and is not orientation-specific. If so, then the positive effects observed here may reflect a real  
280 age-related increase in white matter integrity for specific tracts. This possibility is supported by reports  
281 of fairly widespread increases in fMRI-based functional covariance with aging (**Tomasi and Volkow, 2011**),  
282 which have been proposed to reflect compensatory changes in response to degeneration or dysfunction  
283 of other brain regions. Given the conflicting evidence, however, these effects should be interpreted with  
284 caution. It will be important in future TSA studies to increase the number of ROIs, or query specific crossing  
285 tracts, in order to obtain a more complete picture of age-related effects across white matter.

286 More modest sex differences, and age-by-sex interactions, were also observed for both networks. Pre-  
287 vious DWI-based studies have also found sex differences in FA, typically with males showing higher FA  
288 values (**Takao et al., 2013; Rathee et al., 2016; Menzler et al., 2011**). For DMN, we found negative effects  
289 (males > females) for the PCG(L) with PFCm(L), which accords with findings from **Menzler et al. (2011)**, who  
290 report prominent differences in the cingulum bundle. We also found positive effects (females > males) that  
291 were mostly left lateralized and included LOC(L), which have not commonly been reported in the literature.  
292 Although sex differences in LOC function have been hypothesised on the basis of differential object per-  
293 ception (**Vanston and Strother, 2016**) – a function that has been associated with this region – there does  
294 not currently appear to be much direct evidence for this.

295 It is also notable that, for numerous tracts, we found both positive and negative age effects in different  
296 parts of the same tract (see **Figure 5**). It is not immediately clear how to interpret such a result. If our  
297 inference is that a TSA value represents the number of intact axons projecting between two grey matter  
298 ROIs, this is contradicted by the observation of both increases and decreases in this region – damage to  
299 an axon anywhere along its length will trigger Wallerian degeneration in both directions. On the other  
300 hand, this finding is consistent with the idea that TSA reflects the degree of (de)myelination, which may  
301 be increased on average in one part of the tract and decreased in another. Importantly, there is evidence  
302 that demyelinated axons, while they may be functionally impaired, are not necessarily at higher risk of  
303 degeneration (**Smith et al., 2013**). A third possibility is that TSA is influenced by the degree of crossing  
304 fibres in a particular region along its length; changes to diffusion in directions other than the average  
305 orientation of interest will influence the regression fit used to estimate this metric.

## 306 Limitations and future directions

307 The NKI Rockland dataset was chosen due to its large size, age range, and the use of a single MRI scanner  
308 and protocol. To ensure the cohort was as representative of the general population as possible, and to  
309 enable the analysis of age over the lifespan, we chose to use close to the full age range (18-80), and to  
310 exclude participants with clinical diagnoses. As with most population templates, however, the choice of  
311 cohort is an important consideration when interpreting a derived result. The human brain is known to  
312 show systematic anatomical grey matter changes across the lifespan (*Sowell et al., 2003; Giorgio et al.,*  
313 *2010*), and this will almost certainly bias normalization in a way that may account for a portion of the TSA  
314 effects reported here. It will be important in future studies to assess the influence of this bias, use cohorts  
315 that are more targeted to a particular phenomenon under investigation, and compare the predictions of  
316 TSA to in vivo or post mortem analyses of white matter (e.g., as in *Reveley et al., 2015*).

317 The ability to estimate spatial trajectories of white matter projections between specific pairs of ROIs  
318 could lead to a number of important applications. For instance, this information could be used to pre-  
319 dict the functional outcomes of age-related white matter lesions (WML), which have a prevalence of ~18%  
320 in people aged 60-69 and ~40% in people over 80 (*Vernooij et al., 2008*). Conceivably, clinicians would  
321 identify WML locations using T2-FLAIR imaging, estimate which tracts intersect these lesions, and predict  
322 functional deficits on the basis of the brain regions connected by these tracts. This approach could aug-  
323 ment previous studies investigating connectivity (*Tuladhar et al., 2014*), cortical thickness (*Reid et al., 2010*),  
324 and gait changes related to WML (*de Laat et al., 2012*).

## 325 Materials and Methods

### 326 Participants

327 Participant data were obtained from the publicly available Nathan Klein Institute (NKI) Enhanced Rockland  
328 sample (*Nooner et al., 2012*), through the 1000 Functional Connectomes Project ([www.nitrc.org/projects/fcon\\_1000/](http://www.nitrc.org/projects/fcon_1000/)). We included participants from the first four data releases, while excluding any participant  
329 with an existing clinical diagnosis at the time of scanning. In total, 130 participants (86 female, age range  
330 18 to 80) were analyzed.  
331

### 332 Neuroimaging data and metadata

333 All imaging data in the Rockland sample were acquired from the same scanner (Siemens Magnetom TrioTim,  
334 3.0T). T1-weighted images were obtained using a MPRAGE sequence (TR = 1900 ms; TE = 2.52 ms; voxel size  
335 = 1 mm isotropic). DWI was collected with a high spatial and angular resolution (TR = 2400 ms; TE = 85 ms;  
336 voxel size = 2 mm isotropic; b = 1500 s/mm<sup>2</sup>; 137 gradient directions). Age and sex data were also obtained,  
337 with the Sex factor encoded as 1=Male, 2=Female.

### 338 Preprocessing

339 DWI images for all participants were preprocessed using FMRIB software (*Smith et al., 2004; Woolrich et al.,*  
340 *2009*); specifically, FSL version 6.0.0. Participant datasets were processed in parallel using a Linux-based  
341 SLURM computing cluster, located at the University of Nottingham. Raw diffusion data were first corrected  
342 for eddy current artifacts using the `eddy` command. All  $B_0$  (zero-gradient) images were then averaged and  
343 used to extract a brain mask using the `bet` command. Next, for each voxel in the brain mask, a diffusion  
344 tensor model was fit to the data using `dtifit`, and subsequently passed to the `bedpostx` command, which  
345 infers the existence of crossing fibres and estimates the contribution of each crossing fibre to the diffusion-  
346 weighted signal (*Behrens et al., 2007*). Finally, to express the voxel-wise diffusion models in standard space,  
347 linear and nonlinear transforms between native diffusion and MNI-152 space were estimated, by applying  
348 the `flirt` (12 degrees of freedom) and `fnirt` commands, respectively, using individual FA images as input  
349 and a mean template FA image as the reference. Inverse transforms were also estimated, using the `invwarp`  
350 command, for use in later steps.

## 351 **Regions of interest**

352 Seed regions of interest (ROIs) were obtained from two previously-defined networks (see **Figure 3b**). For  
353 each network, all possible ROI pairs were considered as potential tracts.

354 The *default-mode network* (DMN) was derived from **Schilbach et al. (2012)**, who performed an Activa-  
355 tion Likelihood Estimation (ALE; **Eickhoff et al., 2009, 2012**) meta-analysis using 533 experiments from  
356 the BrainMap database (**Fox and Lancaster, 2002**), querying for regions that were consistently deacti-  
357 vated across tasks. The ROIs were obtained by downloading the DMN network from the ANIMA database  
358 ([https://anima.inm7.de/studies/Schilbach\\_SocialNetworks\\_2012](https://anima.inm7.de/studies/Schilbach_SocialNetworks_2012); **Reid et al., 2016a**). The network was com-  
359 prised of 9 ROIs: anterior cingulate cortex (ACC; left only), lateral occipital cortex (LOC; bilateral), posterior  
360 cingulate gyrus (PCG; bilateral), precuneus (PCm; bilateral), and medial prefrontal cortex (PFCm; bilateral).

361 The *what/where* network (WWN) was derived from **Rottschy et al. (2012)**, with data obtained from the  
362 ANIMA database ([https://anima.inm7.de/studies/Rottschy\\_WorkingMemory\\_2012](https://anima.inm7.de/studies/Rottschy_WorkingMemory_2012)). The authors performed  
363 a conjunction on ALE analyses for tasks testing memory for object identity (“what”; 42 experiments) and  
364 object location (“where”; 13 experiments). The WWN was comprised of 10 ROIs, with 5 brain regions rep-  
365 resented bilaterally. These ROIs were: dorsal and ventral premotor cortex (dPMC, vPMC), superior parietal  
366 lobule (SPL), inferior parietal lobule (IPL), and intraparietal sulcus (IPS).

## 367 **Probabilistic tractography**

368 Probabilistic tractography was performed in MNI-152 space, using the `probtrackx` command (**Behrens et al.,**  
369 **2007**). For both networks, we generated 50,000 streamlines per seed voxel, with the other seed regions as  
370 target masks. We applied a step length of 0.5 mm, a curvature threshold of 0.2, a minimal path distance  
371 of 5 mm, and a fibre threshold of 0.01. A distance correction was also applied. For each voxel `probtrackx`  
372 recorded the number of streamlines which encountered that voxel, producing a separate count for stream-  
373 lines terminating in each target ROI. Additionally, the voxel-wise mean orientation of streamlines between  
374 each seed/target pair was computed.

## 375 **Tract determination**

376 Tracts were determined separately for each ROI pair. Voxel-wise streamline counts for each direction ( $R_a$   
377 to  $R_b$  or  $R_b$  to  $R_a$ ) were first normalized by dividing by the total number of streamlines reaching target  $R_b$   
378 from seed  $R_a$ , and the minimum across both directions was obtained. These minimum images were sub-  
379 sequently averaged over participants, smoothed, and normalized to the range [0,1], yielding a probability  
380  $P_{ab}(i)$  of voxel  $i$  being included in tract  $T_{ab}$ . It is noteworthy that in some cases, the matrix  $\mathbf{P}_{ab}$  of such values  
381 is constrained to a single, geometrically confined tract, while in others, it reflects many possible routes  
382 between two ROIs (see examples in **Figure 2b**). Our objective was to identify the single most probable  
383 tract, or reject the tract altogether if such could not be determined. This was done in a heuristic manner.  
384 Firstly, we thresholded  $\mathbf{P}_{ab}$  by setting all values where  $\mathbf{P}_{ab} < \alpha$  to zero. A threshold of  $\alpha = 0.07$  was applied  
385 by experimentation, in order to both disconnect most low-probability alternative pathways, and ensure  
386 that (for cases where the existence of a tract is known or likely) at least one pathway remained intact.  
387 Additionally, because  $\mathbf{P}_{ab}$  proximal to ROIs tended to be lower than for the main tract trajectory, ROIs were  
388 dilated by 3 voxels to ensure they remained connected after thresholding.

389 We next discretized  $\mathbf{P}_{ab}$  into distance assignments  $\mathbf{D}$ , using a flood-fill approach, assigning all voxel  
390 neighbours of seed region  $R_a$  a value of  $d = 1$ , all subsequent neighbours  $d = 2$ , and so on, until all  
391 voxels in  $T_{ab}$  were assigned a distance. We then identified the voxel of maximal  $\mathbf{P}_{ab}$  for each distance  $d$ ,  
392 constructing a polyline  $\mathbf{L}_{ab}$  with center points of these voxels as its vertices. Inclusion of a vertex in  $\mathbf{L}_{ab}$  was  
393 conditional on two constraints: (1) segment length  $|\mathbf{x}_{i-1,i}| < 4$  mm; and (2) vertex angle  $\theta_i < \pi/3$ . Where a  
394 constraint was violated, the voxel with the next highest  $\mathbf{P}_{ab}$  was tested, and so on until a voxel was found  
395 satisfying the constraints. In cases where no appropriate voxels were found, the maximal voxel was added  
396 and the violation was recorded as a flag for visual inspection.  $\mathbf{L}_{ab}$  was extended in this fashion until: (1)  
397 the target region  $R_b$  was encountered, and the tract was accepted for further analysis; or (2) the maximal  
398 distance was encountered, but not the target region  $R_b$ , and the tract was rejected for further analysis (i.e.,  
399 the thresholding broke all routes, and thus a “true” route between  $R_a$  and  $R_b$  could not be determined).

400 With the assumption that an accepted polyline represents the geometric center of a given tract  $T_{ab}$ , we  
 401 then modelled the probability  $\mathbf{P}_{ab\text{-tract}}$  of a voxel being in that tract, as the product of an uncertainty field  
 402  $\Phi_{ab}$  oriented around  $\mathbf{L}_{ab}$ , and the original probability field  $\mathbf{P}_{ab}$  (see **Figure 1**).

403  $\Phi_{ab}$  was constructed as follows. For every vertex  $v \in \mathbf{L}_{ab}$ , an orientation vector  $\omega_v$  was computed as the  
 404 sum of the segment vectors  $\mathbf{x}_{v-1,v}$  and  $\mathbf{x}_{v,v+1}$  (at the endpoints of  $\mathbf{L}_{ab}$ , only one segment was used). From  
 405  $\omega_v$ , an anisotropic Gaussian kernel  $\phi(i, \omega_v, \mu, \sigma_a, \sigma_r)$  was applied to the subset of voxels within a radius of  
 406 8 mm of  $v$ . Parameters defining the shape of the Gaussian function were fixed at  $\mu = 0$  mm, axial  $\sigma_a = 10$   
 407 mm, and radial  $\sigma_r = 4$  mm; where axial and radial axes were parallel and perpendicular to  $\omega_v$ , respectively.  
 408 For a given voxel  $i$  in  $T_{ab}$ , the maximal value of  $\phi$  across all vertices  $v$  was assigned:

$$\Phi_{ab}(i) = \max_v \left( \phi(i, \omega_v, \mu, \sigma_a, \sigma_r) \right) \quad (1)$$

409  $\mathbf{P}_{ab\text{-tract}}$  was determined as:

$$\mathbf{P}_{ab\text{-tract}} = f(\Phi_{ab} \odot \mathbf{P}_{ab}, d) \quad (2)$$

410 The function  $f(g, d)$  normalizes  $g$ , at each discrete distance  $d$ , to values between 0 and 1.

### 411 Tract-specific anisotropy estimation

412 Having defined (or rejected) a tract  $T_{ab}$ , we were next interested in extracting meaningful diffusion metrics  
 413 from it, which can allow us to perform statistical inference on specific tracts. At each voxel, we thus  
 414 wanted to estimate how strongly its diffusion weighed onto the orientation of the tract at that voxel. To do  
 415 this, we obtained the average orientation (across all participants) of streamlines going through voxels in  
 416  $T_{ab}$  using **probtrackx** (see **Probabilistic tractography**). These average orientation images, along with the  
 417  $\mathbf{P}_{ab\text{-tract}}$  images, were warped from standard to individual participants' diffusion space, using the inverse  
 418 transforms computed in the preprocessing step (see **Preprocessing**).

419 Next, for each participant, and for each voxel  $j$ , the fraction of the diffusion-weighted signal along the  
 420 average tract orientation was estimated by fitting the following linear regression using the **statsmodels**  
 421 Python library (<https://www.statsmodels.org>):

$$\mathbf{s}_j / s_j^0 = \beta_j \cdot e^{-b\delta(\mathbf{R}^T \bar{\mathbf{v}}_j)^2} + c_j \quad (3)$$

422 where  $\bar{\mathbf{v}}_j$  is the average streamline orientation,  $\mathbf{R}$  is the  $M \times 3$  matrix of gradient orientation vectors  
 423 (where  $M$  is the number of orientations, here  $M = 137$ ),  $s_j^0$  is the non-diffusion-weighted signal,  $\mathbf{s}_j$  is the  
 424 observed signal at each gradient orientation,  $b$  is the gradient strength (b-value), and  $\delta$  is the diffusivity.

425 Notably, this formulation is equivalent to that presented in **Behrens et al. (2003, 2007)**, but applying  
 426 only to the average orientation  $\bar{\mathbf{v}}_j$ .  $\beta_j$  is the regression coefficient (with  $c_j$  being an intercept term), and is  
 427 analogous to the  $f$  value from the crossing fibres model; i.e., the fraction of signal contributed by  $\bar{\mathbf{v}}_j$ . We  
 428 refer to these coefficients as *tract-specific anisotropy* (TSA).

### 429 Statistical analyses

430 The TSA values obtained in the preceding step were warped back into standard space and smoothed with  
 431 a Gaussian kernel with a full-width at half-maximum (FWHM) of 1.5 mm. Subsequently, for each voxel in a  
 432 tract, the following linear regression model was tested, for the first-order effects of *Age* and *Sex*, and their  
 433 interaction:

$$\text{TSA} = \beta_0 + \beta_1 \cdot \text{Age} + \beta_2 \cdot \text{Sex} + \beta_3 \cdot \text{Age} \times \text{Sex} + \epsilon \quad (4)$$

434 For each contrast, we next wanted to summarize the resulting t-statistics at each discrete distance  
 435 along the trajectory of the tract. To do this, following an approach similar to TBSS (**Smith et al., 2006**), we  
 436 computed weighted t-statistics for each voxel  $j$  as  $t'(j) = t(j) \cdot \mathbf{P}_{ab\text{-tract}}(j)^\lambda$ , where  $\lambda$  determines the rate of  
 437 decay (here, we set  $\lambda = 1.0$ ). At each discrete distance  $d$  along the tract, we assigned (unweighted)  $t_d$  as  
 438 the t-statistic corresponding to the maximal  $t'_d$ .

439 Because anatomical properties along a tract can be assumed to form a continuous random field (i.e.,  
440 neighbouring vertices have a spatial dependence), we analyzed the resulting distance-wise summary statis-  
441 tics as a one-dimensional random field, using the `rft1d` Python library (<http://www.spm1d.org/rft1d/>;  
442 **Pataky, 2016**). Firstly, the spatial smoothness of model residuals was estimated for each tract as a FWHM  
443 value, and averaged across tracts. For each tract, this mean FWHM was used to compute  $t^*$ , the critical  
444 t-value at  $\alpha = 0.05$  for a Gaussian field, using an inverse survival function. Secondly, cluster-wise inference  
445 was performed to identify significant clusters along the tract, with a minimum cluster size of 3. Thirdly,  
446 p-values for all clusters, across all tracts, were corrected for family-wise error using a false discovery  
447 rate (FDR) threshold of 0.05. FDR was performed using the `statsmodels` Python library, with a two-stage  
448 non-negative FDR method (`fdr_tsbky`). Finally, to estimate the spatial extent of effects for a given tract,  
449 significant t-values were summed over that tract, for positive and negative t-values separately.

## 450 Code and data sharing

451 All code for this procedure was written in Python 3 (Anaconda build), making system calls of native FSL  
452 packages, as indicated. The following third-party Python libraries were also used: `nibabel`, `nilearn`, and  
453 `statsmodels`. Source code for all procedures used in this study is freely available at [https://github.com/](https://github.com/neurocoglab/dwi-tracts)  
454 [neurocoglab/dwi-tracts](https://github.com/neurocoglab/dwi-tracts). This includes: scripts to run FSL preprocessing and DWI analyses, using stan-  
455 dard SGE- or SLURM-style parallel environments; a module to estimate core trajectories and TSA values; a  
456 module to fit general linear models to TSA values; and a module to plot the results of these. The out-  
457 put of these modules (polylines, surface meshes, graphs) can be visualised using ModelGUI software,  
458 an open source Java library available at <https://github.com/neurocoglab/mgui-core>. The NKI-Rockland  
459 data is freely available at [www.nitrc.org/projects/fcon\\_1000/](http://www.nitrc.org/projects/fcon_1000/). Participant- and sample-wise data will  
460 be made freely available on the University of Nottingham Research Data Management Repository at [https://](https://doi.org/10.17639/nott.7102)  
461 [doi.org/10.17639/nott.7102](https://doi.org/10.17639/nott.7102).

## 462 Acknowledgements

463 We thank Saad Jbabdi for extremely helpful feedback, in particular regarding the TSA approach, as well as  
464 Marije ter Wal and Christopher Madan for their invaluable advice on various parts of the manuscript. 2D  
465 and 3D renderings for this publication were generated using ModelGUI, a free and open source software  
466 package (<http://www.modelgui.org/>). Parallel processing at the University of Nottingham was provided  
467 through its Augusta HPC service and the Beacon of Excellence for Precision Imaging, which provide access  
468 to high performance computing resources for the University's neuroimaging research community.

469 This study was supported by the the National Institute of Mental Health (R01-MH074457), the Helmholtz  
470 Portfolio Theme "Supercomputing and Modeling for the Human Brain" and the European Union's Horizon  
471 2020 Research and Innovation Programme under Grant Agreement No. 945539 (HBP SGA3).

## 472 References

- 473 **Abotiz F**, Rodriguez E, Olivares R, Zaidel E (1997). Age-related changes in fibre composition of the human corpus callosum:  
474 sex differences. *Neuroreport*. 7(11):1761–1764. <https://oae.ovid.com/article/00001756-199607290-00013/HTML>.
- 475 **Assaf Y**, Pasternak O (2007). Diffusion Tensor Imaging (DTI)-based White Matter Mapping in Brain Research: A Review.  
476 *Journal of Molecular Neuroscience*. 34(1):51–61. doi: 10.1007/s12031-007-0029-0.
- 477 **Basser PJ**, Jones DK (2002). Diffusion-tensor MRI: theory, experimental design and data analysis - a technical review.  
478 *NMR in Biomedicine*. 15(7-8):456–467. doi: 10.1002/nbm.783.
- 479 **Behrens TEJ**, Berg HJ, Jbabdi S, Rushworth MFS, Woolrich MW (2007). Probabilistic diffusion tractography with multiple  
480 fibre orientations: What can we gain?. *NeuroImage*. 34(1):144–155. doi: 10.1016/j.neuroimage.2006.09.018.
- 481 **Behrens TEJ**, Woolrich MW, Jenkinson M, Johansen-Berg H, Nunes RG, Clare S, Matthews PM, Brady JM, Smith SM (2003).  
482 Characterization and propagation of uncertainty in diffusion-weighted MR imaging. *Magnetic Resonance in Medicine: Official Journal of the Society of Magnetic Resonance in Medicine / Society of Magnetic Resonance in Medicine*.  
483 50(5):1077–1088. doi: 10.1002/mrm.10609.
- 484

- 485 **Bennett IJ**, Madden DJ (2014). Disconnected aging: Cerebral white matter integrity and age-related differences in cogni-  
486 tion. *Neuroscience*. 276:187–205. doi: [10.1016/j.neuroscience.2013.11.026](https://doi.org/10.1016/j.neuroscience.2013.11.026).
- 487 **Bennett IJ**, Madden DJ, Vaidya CJ, Howard DV, Howard JH (2009). Age-related differences in multiple measures of  
488 white matter integrity: A diffusion tensor imaging study of healthy aging. *Human Brain Mapping*. p. NA–NA. doi:  
489 [10.1002/hbm.20872](https://doi.org/10.1002/hbm.20872).
- 490 **Burzynska AZ**, Preuschhof C, Bäckman L, Nyberg L, Li SC, Lindenberger U, Heekeren HR (2010). Age-related differ-  
491 ences in white matter microstructure: Region-specific patterns of diffusivity. *NeuroImage*. 49(3):2104–2112. doi:  
492 [10.1016/j.neuroimage.2009.09.041](https://doi.org/10.1016/j.neuroimage.2009.09.041).
- 493 **Caspers S**, Axer M (2017). Decoding the microstructural correlate of diffusion MRI. *NMR in Biomedicine*. 32(4):e3779. doi:  
494 [10.1002/nbm.3779](https://doi.org/10.1002/nbm.3779).
- 495 **Catani M**, Howard RJ, Pajevic S, Jones DK (2002). Virtual in Vivo Interactive Dissection of White Matter Fasciculi in the  
496 Human Brain. *NeuroImage*. 17(1):77–94. doi: [10.1006/nimg.2002.1136](https://doi.org/10.1006/nimg.2002.1136).
- 497 **Chung HW**, Chou MC, Chen CY (2010). Principles and Limitations of Computational Algorithms in Clinical Diffusion Tensor  
498 MR Tractography. *American Journal of Neuroradiology*. 32(1):3–13. doi: [10.3174/ajnr.a2041](https://doi.org/10.3174/ajnr.a2041).
- 499 **Colby JB**, Soderberg L, Lebel C, Dinov ID, Thompson PM, Sowell ER (2012). Along-tract statistics allow for enhanced  
500 tractography analysis. *NeuroImage*. 59(4):3227–3242. doi: [10.1016/j.neuroimage.2011.11.004](https://doi.org/10.1016/j.neuroimage.2011.11.004).
- 501 **Daianu M**, Jahanshad N, Nir TM, Toga AW, Jack CR, Weiner MW, Paul M Thompson ftADNI (2013). Breakdown of Brain  
502 Connectivity Between Normal Aging and Alzheimer's Disease: A Structural k-Core Network Analysis. *Brain Connectivity*.  
503 3(4):407–422. doi: [10.1089/brain.2012.0137](https://doi.org/10.1089/brain.2012.0137).
- 504 **Douaud G**, Jbabdi S, Behrens TEJ, Menke RA, Gass A, Monsch AU, Rao A, Whitcher B, Kindlmann G, Matthews PM, Smith S  
505 (2011). DTI measures in crossing-fibre areas: Increased diffusion anisotropy reveals early white matter alteration in  
506 MCI and mild Alzheimer's disease. *NeuroImage*. 55(3):880–890. doi: [10.1016/j.neuroimage.2010.12.008](https://doi.org/10.1016/j.neuroimage.2010.12.008).
- 507 **Eickhoff SB**, Bzdok D, Laird AR, Kurth F, Fox PT (2012). Activation likelihood estimation meta-analysis revisited. *NeuroIm-*  
508 *age*. 59(3):2349–2361. doi: [10.1016/j.neuroimage.2011.09.017](https://doi.org/10.1016/j.neuroimage.2011.09.017).
- 509 **Eickhoff SB**, Laird AR, Grefkes C, Wang LE, Zilles K, Fox PT (2009). Coordinate-based activation likelihood estimation  
510 meta-analysis of neuroimaging data: A random-effects approach based on empirical estimates of spatial uncertainty.  
511 *Human Brain Mapping*. 30(9):2907–2926. doi: [10.1002/hbm.20718](https://doi.org/10.1002/hbm.20718).
- 512 **Fonov V**, Evans A, McKinstry R, Almlí C, Collins D (2009). Unbiased nonlinear average age-appropriate brain templates  
513 from birth to adulthood. *NeuroImage*. 47:S102. doi: [10.1016/s1053-8119\(09\)70884-5](https://doi.org/10.1016/s1053-8119(09)70884-5).
- 514 **Fox PT**, Lancaster JL (2002). Mapping context and content: the BrainMap model. *Nature Reviews Neuroscience*. 3(4):319–  
515 321. doi: [10.1038/nrn789](https://doi.org/10.1038/nrn789).
- 516 **Giorgio A**, Santelli L, Tomassini V, Bosnell R, Smith S, Stefano ND, Johansen-Berg H (2010). Age-related changes in grey  
517 and white matter structure throughout adulthood. *NeuroImage*. 51(3):943–951. doi: [10.1016/j.neuroimage.2010.03.004](https://doi.org/10.1016/j.neuroimage.2010.03.004).
- 518 **Hafkemeijer A**, van der Grond J, Rombouts SARB (2012). Imaging the default mode network in aging and dementia.  
519 *Biochimica et Biophysica Acta (BBA) - Molecular Basis of Disease*. 1822(3):431–441. doi: [10.1016/j.bbadis.2011.07.008](https://doi.org/10.1016/j.bbadis.2011.07.008).
- 520 **Jbabdi S**, Behrens TEJ, Smith SM (2010). Crossing fibres in tract-based spatial statistics. *NeuroImage*. 49(1):249–256. doi:  
521 [10.1016/j.neuroimage.2009.08.039](https://doi.org/10.1016/j.neuroimage.2009.08.039).
- 522 **Jeurissen B**, Leemans A, Tournier JD, Jones DK, Sijbers J (2012). Investigating the prevalence of complex fiber configura-  
523 tions in white matter tissue with diffusion magnetic resonance imaging. *Human Brain Mapping*. 34(11):2747–2766. doi:  
524 [10.1002/hbm.22099](https://doi.org/10.1002/hbm.22099).
- 525 **Jones DT**, Machulda MM, Vemuri P, McDade EM, Zeng G, Senjem ML, Gunter JL, Przybelski SA, Avula RT, Knopman DS, Boeve  
526 BF, Petersen RC, Jack CR (2011). Age-related changes in the default mode network are more advanced in Alzheimer  
527 disease. *Neurology*. 77(16):1524–1531. doi: [10.1212/wnl.0b013e318233b33d](https://doi.org/10.1212/wnl.0b013e318233b33d).
- 528 **Jones DK**, Travis AR, Eden G, Pierpaoli C, Basser PJ (2005). PASTA: Pointwise assessment of streamline tractography  
529 attributes. *Magn Reson Med*. 53(6):1462–1467. doi: [10.1002/mrm.20484](https://doi.org/10.1002/mrm.20484).
- 530 **Kochunov P**, Thompson PM, Lancaster JL, Bartzokis G, Smith S, Coyle T, Royall DR, Laird A, Fox PT (2007). Relationship  
531 between white matter fractional anisotropy and other indices of cerebral health in normal aging: Tract-based spatial  
532 statistics study of aging. *NeuroImage*. 35(2):478–487. doi: [10.1016/j.neuroimage.2006.12.021](https://doi.org/10.1016/j.neuroimage.2006.12.021).



- 533 **Kodiweera C**, Alexander AL, Harezlak J, McAllister TW, Wu YC (2016). Age effects and sex differences in human brain  
534 white matter of young to middle-aged adults: A DTI, NODDI, and q-space study. *NeuroImage*. 128:180–192. doi:  
535 [10.1016/j.neuroimage.2015.12.033](https://doi.org/10.1016/j.neuroimage.2015.12.033).
- 536 **de Laat KF**, Reid AT, Grim DC, Evans AC, Kötter R, van Norden AGW, de Leeuw FE (2012). Cortical thickness is associated with  
537 gait disturbances in cerebral small vessel disease. *NeuroImage*. 59(2):1478–1484. doi: [10.1016/j.neuroimage.2011.08.005](https://doi.org/10.1016/j.neuroimage.2011.08.005).
- 538 **Lohse C**, Bassett DS, Lim KO, Carlson JM (2014). Resolving Anatomical and Functional Structure in Human Brain Or-  
539 ganization: Identifying Mesoscale Organization in Weighted Network Representations. *PLoS Computational Biology*.  
540 10(10):e1003712. doi: [10.1371/journal.pcbi.1003712](https://doi.org/10.1371/journal.pcbi.1003712).
- 541 **Madhavan KM**, McQueeney T, Howe SR, Shear P, Szaflarski J (2014). Superior longitudinal fasciculus and language func-  
542 tioning in healthy aging. *Brain Research*. 1562:11–22. doi: [10.1016/j.brainres.2014.03.012](https://doi.org/10.1016/j.brainres.2014.03.012).
- 543 **Marstaller L**, Williams M, Rich A, Savage G, Burianová H (2015). Aging and large-scale functional networks: White mat-  
544 ter integrity, gray matter volume, and functional connectivity in the resting state. *Neuroscience*. 290:369–378. doi:  
545 [10.1016/j.neuroscience.2015.01.049](https://doi.org/10.1016/j.neuroscience.2015.01.049).
- 546 **Mazziotta JC**, Toga AW, Evans A, Fox P, Lancaster J (1995). A Probabilistic Atlas of the Human Brain: Theory and Rationale  
547 for Its Development. *NeuroImage*. 2(2):89–101. doi: [10.1006/nimg.1995.1012](https://doi.org/10.1006/nimg.1995.1012).
- 548 **Menzler K**, Belke M, Wehrmann E, Krakow K, Lengler U, Jansen A, Hamer HM, Oertel WH, Rosenow F, Knake S (2011). Men  
549 and women are different: Diffusion tensor imaging reveals sexual dimorphism in the microstructure of the thalamus,  
550 corpus callosum and cingulum. *NeuroImage*. 54(4):2557–2562. doi: [10.1016/j.neuroimage.2010.11.029](https://doi.org/10.1016/j.neuroimage.2010.11.029).
- 551 **Mollink J**, Kleinnijenhuis M, van Cappellen van Walsum AM, Sotiropoulos SN, Cottaar M, Mirfin C, Heinrich MP, Jenkin-  
552 son M, Pallebage-Gamarallage M, Ansorge O, Jbabdi S, Miller KL (2017). Evaluating fibre orientation dispersion in  
553 white matter: Comparison of diffusion MRI, histology and polarized light imaging. *NeuroImage*. 157:561–574. doi:  
554 [10.1016/j.neuroimage.2017.06.001](https://doi.org/10.1016/j.neuroimage.2017.06.001).
- 555 **Nooner KB**, Mennes M, Li Q, Hinz CM, Kaplan MS, Rachlin AB, Cheung B, Yan C, Calhoun V, Courtney W, King M, Kelly  
556 AMC, Martino AD, Petkova E, Biswal B, Hoptman MJ, Javitt DC, Milham MP (2012). The NKI-Rockland sample: a model for  
557 accelerating the pace of discovery science in psychiatry. *Frontiers in Neuroscience*. 6:152. doi: [10.3389/fnins.2012.00152](https://doi.org/10.3389/fnins.2012.00152).
- 558 **Pataky TC** (2016). rft1d : Smooth One-Dimensional Random Field Upcrossing Probabilities in Python. *Journal of Statistical*  
559 *Software*. 71(7). doi: [10.18637/jss.v071.i07](https://doi.org/10.18637/jss.v071.i07).
- 560 **Rathee R**, Rallabandi VPS, Roy PK (2016). Age-related Differences in White Matter Integrity in Healthy Human Brain:  
561 Evidence from Structural Mri and Diffusion Tensor Imaging. *Magnetic Resonance Insights*. 9:MRI.S39666. doi:  
562 [10.4137/mri.s39666](https://doi.org/10.4137/mri.s39666).
- 563 **Reid AT** (2016). The quest for the human connectome: a progress report [blog post]. <http://andrew.modelgui.org/blog/8>.
- 564 **Reid AT**, Bzdok D, Genon S, Langner R, Müller VI, Eickhoff CR, Hoffstaedter F, Cieslik EC, Fox PT, Laird AR, Amunts K, Caspers  
565 S, Eickhoff SB (2016). ANIMA: A data-sharing initiative for neuroimaging meta-analyses. *NeuroImage*. 124:1245–1253.  
566 doi: [10.1016/j.neuroimage.2015.07.060](https://doi.org/10.1016/j.neuroimage.2015.07.060).
- 567 **Reid AT**, Evans AC (2013). Structural networks in Alzheimer’s disease. *European Neuropsychopharmacology*. 23(1):63–77.  
568 doi: [10.1016/j.euroneuro.2012.11.010](https://doi.org/10.1016/j.euroneuro.2012.11.010).
- 569 **Reid AT**, Lewis J, Bezgin G, Khundrakpam B, Eickhoff SB, McIntosh AR, Bellec P, Evans AC (2016). A cross-  
570 modal, cross-species comparison of connectivity measures in the primate brain. *NeuroImage*. 125:311–331. doi:  
571 [10.1016/j.neuroimage.2015.10.057](https://doi.org/10.1016/j.neuroimage.2015.10.057).
- 572 **Reid AT**, van Norden AGW, de Laat KF, van Oudheusden LJB, Zwiers MP, Evans AC, de Leeuw FE, Kötter R (2010). Patterns of  
573 cortical degeneration in an elderly cohort with cerebral small vessel disease. *Human brain mapping*. 31(12):1983–92.  
574 doi: [10.1002/hbm.20994](https://doi.org/10.1002/hbm.20994).
- 575 **Reveley C**, Seth AK, Pierpaoli C, Silva AC, Yu D, Saunders RC, Leopold DA, Ye FQ (2015). Superficial white matter fiber sys-  
576 tems impede detection of long-range cortical connections in diffusion MR tractography. *Proceedings of the National*  
577 *Academy of Sciences*. 112(21):E2820–E2828. doi: [10.1073/pnas.1418198112](https://doi.org/10.1073/pnas.1418198112).
- 578 **Rottschy C**, Langner R, Dogan I, Reetz K, Laird AR, Schulz JB, Fox PT, Eickhoff SB (2012). Modelling neural correlates of work-  
579 ing memory: A coordinate-based meta-analysis. *NeuroImage*. 60(1):830–846. doi: [10.1016/j.neuroimage.2011.11.050](https://doi.org/10.1016/j.neuroimage.2011.11.050).

- 580 **Sambataro F**, Murty VP, Callicott JH, Tan HY, Das S, Weinberger DR, Mattay VS (2010). Age-related alterations in  
581 default mode network: Impact on working memory performance. *Neurobiology of Aging*. 31(5):839–852. doi:  
582 [10.1016/j.neurobiolaging.2008.05.022](https://doi.org/10.1016/j.neurobiolaging.2008.05.022).
- 583 **Schaeffer DJ**, Johnston KD, Gilbert KM, Gati JS, Menon RS, Everling S (2018). In vivo manganese tract tracing of frontal  
584 eye fields in rhesus macaques with ultra-high field MRI: Comparison with DWI tractography. *NeuroImage*. 181:211–218.  
585 doi: [10.1016/j.neuroimage.2018.06.072](https://doi.org/10.1016/j.neuroimage.2018.06.072).
- 586 **Schilbach L**, Bzdok D, Timmermans B, Fox PT, Laird AR, Vogeley K, Eickhoff SB (2012). Introspective Minds: Using ALE Meta-  
587 Analyses to Study Commonalities in the Neural Correlates of Emotional Processing, Social & Unconstrained Cognition.  
588 *PLoS ONE*. 7(2):e30920. doi: [10.1371/journal.pone.0030920](https://doi.org/10.1371/journal.pone.0030920).
- 589 **Smith CM**, Cooksey E, Duncan ID (2013). Myelin Loss Does Not Lead to Axonal Degeneration in a Long-Lived Model of  
590 Chronic Demyelination. *Journal of Neuroscience*. 33(6):2718–2727. doi: [10.1523/jneurosci.4627-12.2013](https://doi.org/10.1523/jneurosci.4627-12.2013).
- 591 **Smith SM**, Jenkinson M, Johansen-Berg H, Rueckert D, Nichols TE, Mackay CE, Watkins KE, Ciccarelli O, Cader MZ, Matthews  
592 PM, Behrens TEJ (2006). Tract-based spatial statistics: Voxelwise analysis of multi-subject diffusion data. *NeuroImage*.  
593 31(4):1487–1505. doi: [10.1016/j.neuroimage.2006.02.024](https://doi.org/10.1016/j.neuroimage.2006.02.024).
- 594 **Smith SM**, Jenkinson M, Woolrich MW, Beckmann CF, Behrens TEJ, Johansen-Berg H, Bannister PR, Luca MD, Drobn-  
595 jak I, Flitney DE, Niazy RK, Saunders J, Vickers J, Zhang Y, Stefano ND, Brady JM, Matthews PM (2004). Advances  
596 in functional and structural MR image analysis and implementation as FSL. *NeuroImage*. 23:S208–S219. doi:  
597 [10.1016/j.neuroimage.2004.07.051](https://doi.org/10.1016/j.neuroimage.2004.07.051).
- 598 **Smith SM**, Johansen-Berg H, Jenkinson M, Rueckert D, Nichols TE, Miller KL, Robson MD, Jones DK, Klein JC, Bartsch  
599 AJ, Behrens TEJ (2007). Acquisition and voxelwise analysis of multi-subject diffusion data with Tract-Based Spatial  
600 Statistics. *Nature Protocols*. 2(3):499–503. doi: [10.1038/nprot.2007.45](https://doi.org/10.1038/nprot.2007.45).
- 601 **Sowell ER**, Peterson BS, Thompson PM, Welcome SE, Henkenius AL, Toga AW (2003). Mapping cortical change across the  
602 human life span. *Nature Neuroscience*. 6(3):309–315. doi: [10.1038/nn1008](https://doi.org/10.1038/nn1008).
- 603 **Takao H**, Hayashi N, Ohtomo K (2013). Sex dimorphism in the white matter: Fractional anisotropy and brain size. *Journal*  
604 *of Magnetic Resonance Imaging*. 39(4):917–923. doi: [10.1002/jmri.24225](https://doi.org/10.1002/jmri.24225).
- 605 **Tang Y**, Nyengaard JR, Pakkenberg B, Gundersen HJG (1997). Age-Induced White Matter Changes in the Human Brain: A  
606 Stereological Investigation. *Neurobiology of Aging*. 18(6):609–615. doi: [10.1016/s0197-4580\(97\)00155-3](https://doi.org/10.1016/s0197-4580(97)00155-3).
- 607 **Tomasi D**, Volkow ND (2011). Aging and functional brain networks. *Molecular Psychiatry*. 17(5):549–558. doi:  
608 [10.1038/mp.2011.81](https://doi.org/10.1038/mp.2011.81).
- 609 **Tuladhar AM**, Reid AT, Shumskaya E, de Laat KF, van Norden AGW, van Dijk EJ, Norris DG, de Leeuw FE (2014). Re-  
610 lationship between white matter hyperintensities, cortical thickness, and cognition. *Stroke*. 46(2):425–432. doi:  
611 [10.1161/STROKEAHA.114.007146](https://doi.org/10.1161/STROKEAHA.114.007146).
- 612 **Vanston JE**, Strother L (2016). Sex differences in the human visual system. *Journal of Neuroscience Research*. 95(1–2):617–  
613 625. doi: [10.1002/jnr.23895](https://doi.org/10.1002/jnr.23895).
- 614 **Vernooij MW**, de Groot M, van der Lugt A, Ikram MA, Krestin GP, Hofman A, Niessen WJ, Breteler MMB (2008). White  
615 matter atrophy and lesion formation explain the loss of structural integrity of white matter in aging. *NeuroImage*.  
616 43(3):470–477. doi: [10.1016/j.neuroimage.2008.07.052](https://doi.org/10.1016/j.neuroimage.2008.07.052).
- 617 **Woolrich MW**, Jbabdi S, Patenaude B, Chappell M, Makni S, Behrens T, Beckmann C, Jenkinson M, Smith SM (2009).  
618 Bayesian analysis of neuroimaging data in FSL. *NeuroImage*. 45(1):S173–S186. doi: [10.1016/j.neuroimage.2008.10.055](https://doi.org/10.1016/j.neuroimage.2008.10.055).
- 619 **Zhu T**, Hu R, Qiu X, Taylor M, Tso Y, Yiannoutsos C, Navia B, Mori S, Ekholm S, Schifitto G, Zhong J (2011). Quantification of  
620 accuracy and precision of multi-center DTI measurements: A diffusion phantom and human brain study. *NeuroImage*.  
621 56(3):1398–1411. doi: [10.1016/j.neuroimage.2011.02.010](https://doi.org/10.1016/j.neuroimage.2011.02.010).

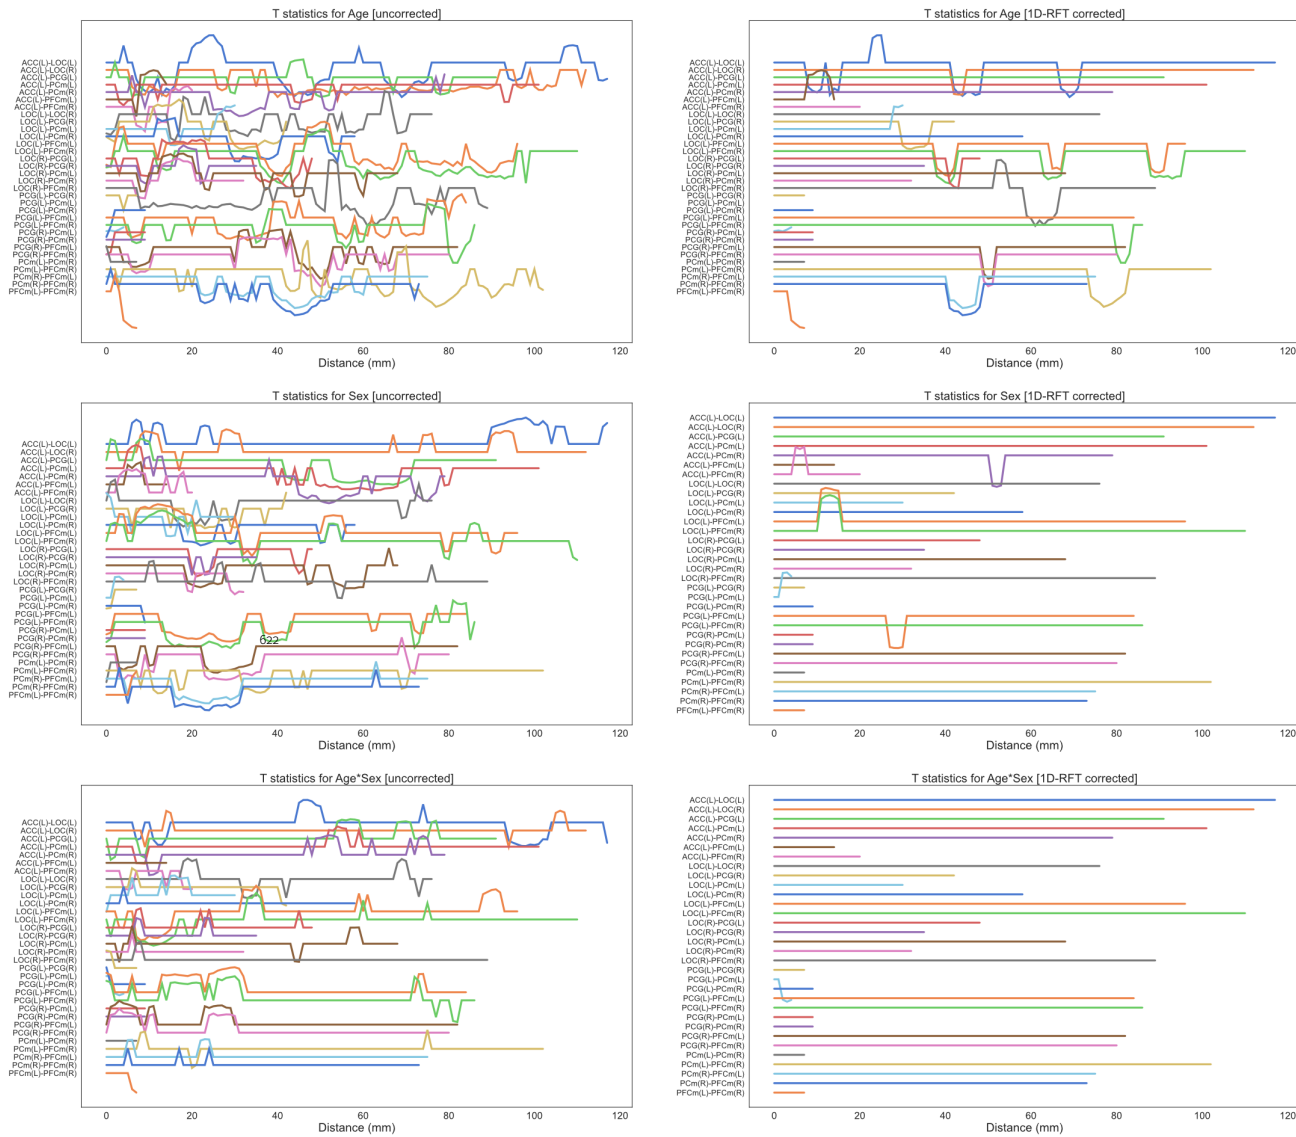

**Figure 5-Figure supplement 1.** Distance traces show the t-values for *Age*, *Sex*, and *Age x Sex*, for all ROI pairs in the DMN. Plots on the left show uncorrected t-values, and plots on the right show t-values derived from one-dimensional random field theory (1D-RFT) and false-discovery rate (FDR) < 0.05. Line separation is  $t = 1$ .

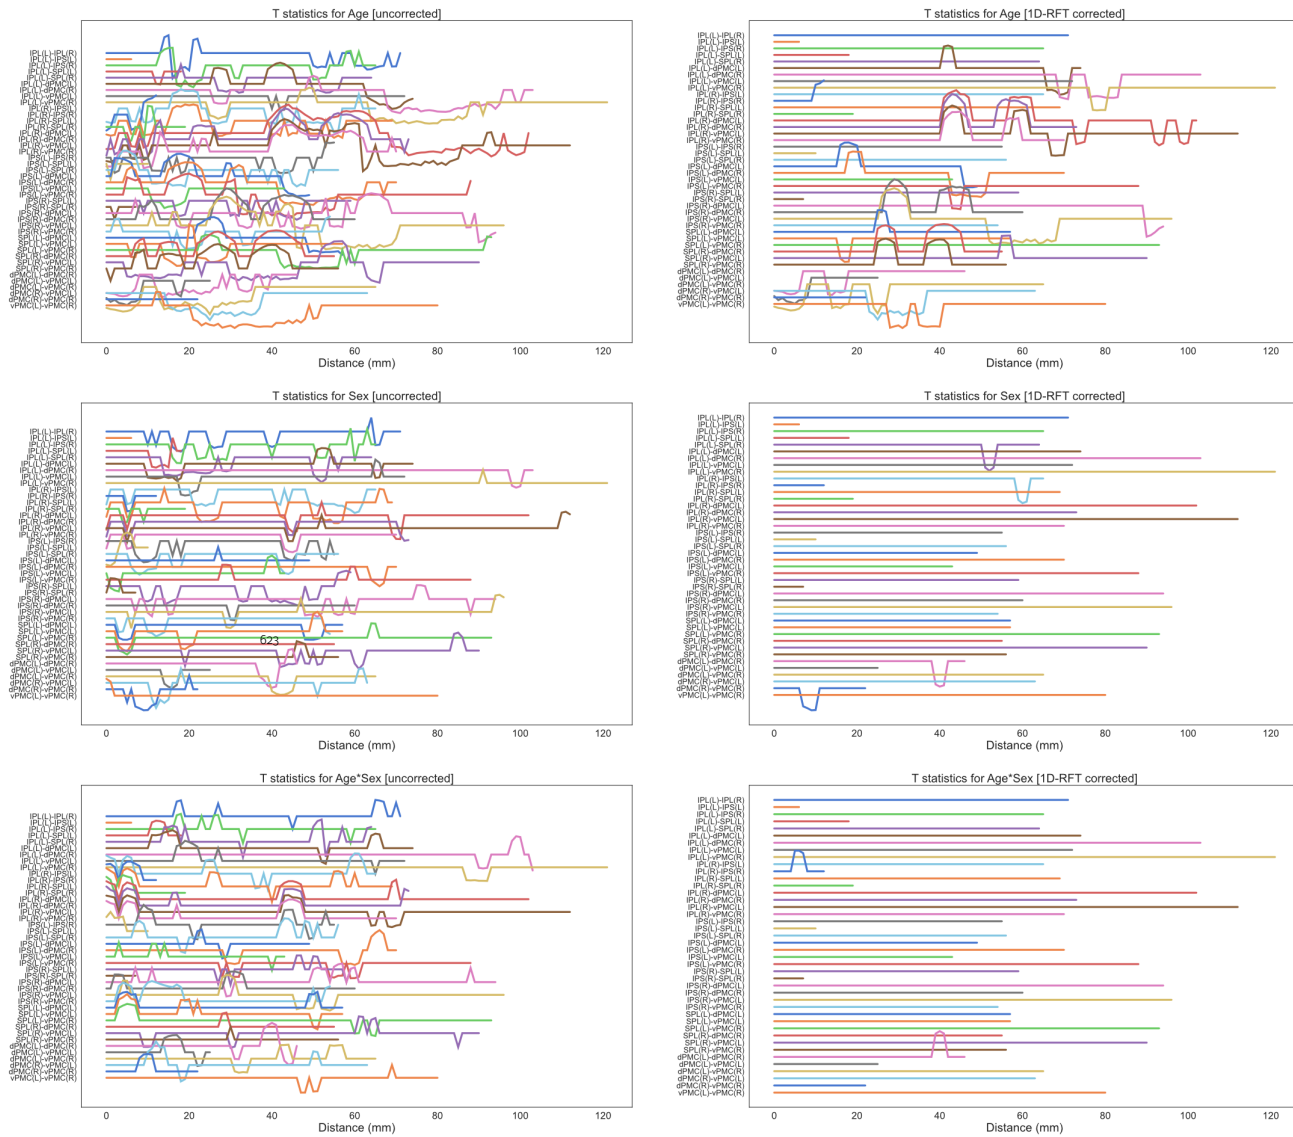

**Figure 5—Figure supplement 2.** Distance traces show the t-values for *Age*, *Sex*, and *Age* × *Sex*, for all ROI pairs in the WWN. Plots on the left show uncorrected t-values, and plots on the right show t-values derived from one-dimensional random field theory (1D-RFT) and false-discovery rate (FDR) < 0.05. Line separation is  $t = 1$ .

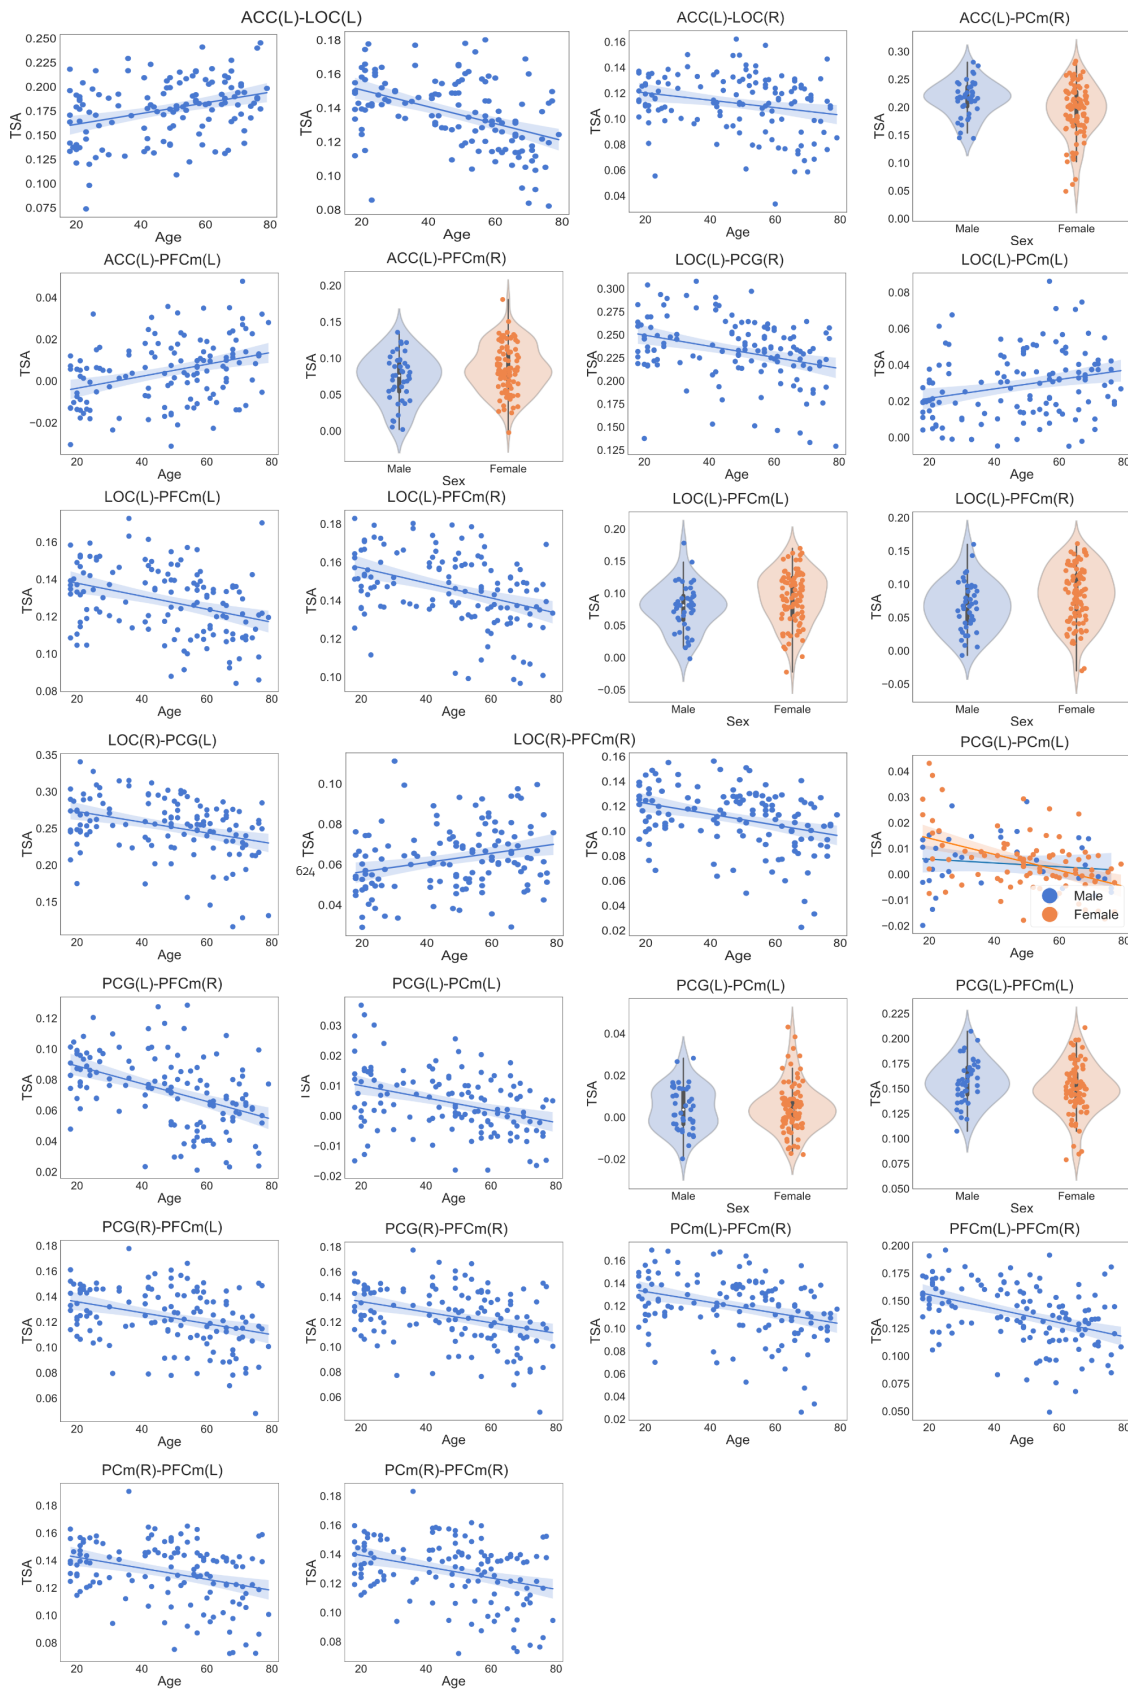

**Figure 6—Figure supplement 1.** Scatter and violin plots showing significant effects for all tracts in the DMN.

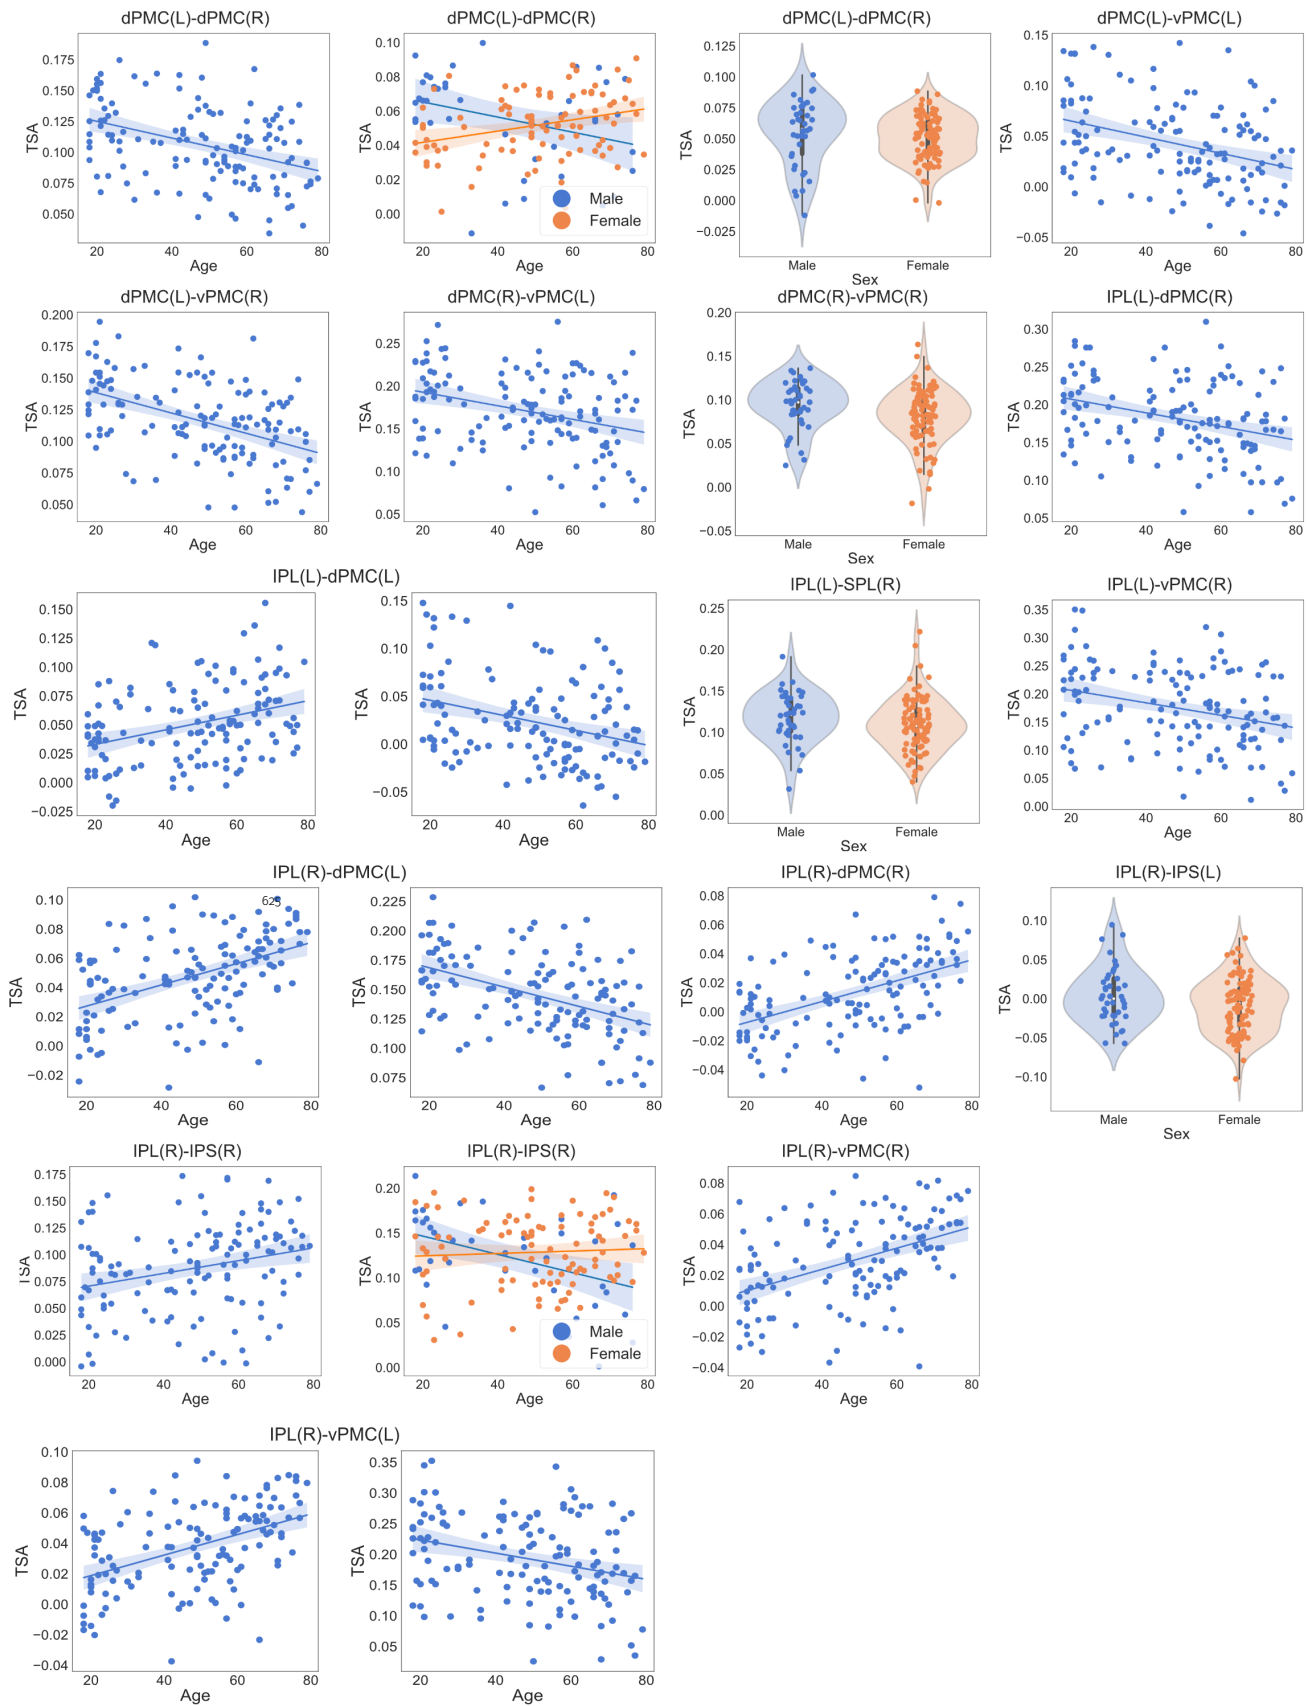

**Figure 6-Figure supplement 2.** Scatter and violin plots showing significant effects for all tracts in the WWN (Part A).

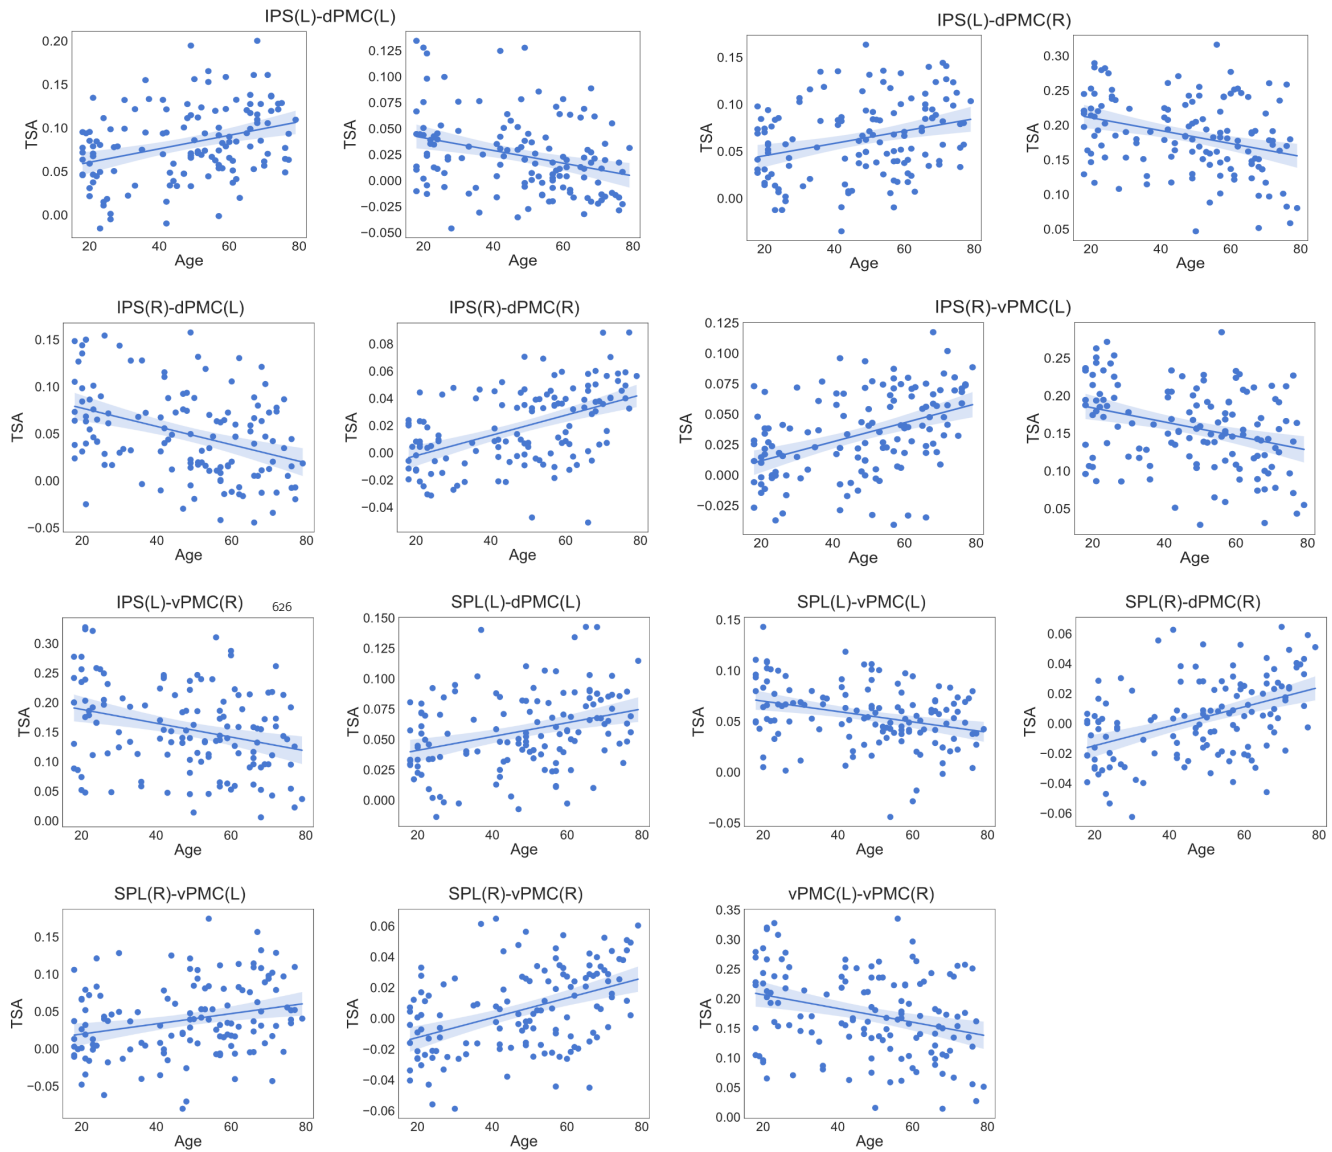

**Figure 6-Figure supplement 3.** Scatter plots showing significant effects for all tracts in the WVN (Part B).
